# Supplementary material for: New Flexible Analogues of 8-Aza-7-deazapurine Nucleosides as Potential Antibacterial Agents
Source: MDPI journal article supplement (doi:10.3390/ijms242015421), 2023-10-21

## Supplementary Material

### New flexible analogues of 8-aza-7-deazapurine nucleosides as potential antibacterial agents

Anastasia Khandazhinskaya<sup>1†</sup>, Barbara Eletskaia<sup>2†</sup>, Anton Mironov<sup>2,3</sup>, Irina Konstantinova<sup>2</sup>, Olga Efremenkova<sup>4</sup>, Sofya Andreevskaya<sup>5</sup>, Tatiana Smirnova<sup>5</sup>, Larisa Chernousova<sup>5</sup>, Evgenia Kondrashova<sup>1</sup>, Alexander Chizhov<sup>6</sup>, Katherine Seley-Radtke<sup>7</sup>, Sergey Kochetkov<sup>1</sup>, Elena Matyugina<sup>1\*</sup>

<sup>1</sup>*Engelhardt Institute of Molecular Biology of the Russian Academy of Sciences, 32 Vavilov St., Moscow 119991, Russia*

<sup>2</sup>*Shemyakin-Ovchinnikov Institute of Bioorganic Chemistry, Russian Academy of Sciences, Moscow 117997, Russia*

<sup>3</sup>*Peoples' Friendship University of Russia (RUDN University), Moscow, 117198, Russian Federation*

<sup>4</sup>*Gause Institute of New Antibiotics, Bol'shaya Pirogovskaya St. 11, Moscow, 119021, Russia*

<sup>5</sup>*Central Tuberculosis Research Institute, 2 Yauzskaya Alley, Moscow, 107564, Russia;*

<sup>6</sup>*Zelinsky Institute of Organic Chemistry RAS, Leninsky pr. 47, Moscow 119991, Russia;*

<sup>7</sup>*Department of Chemistry & Biochemistry, University of Maryland, Baltimore County, Baltimore, MD 21250, USA*

#### Table of Content

|                                                                                              |
|----------------------------------------------------------------------------------------------|
| HPLC and mass spectrometry data                                                              |
| <sup>1</sup> H and <sup>13</sup> C NMR spectra of compounds <b>1a</b> , <b>1b</b>            |
| <sup>1</sup> H, <sup>13</sup> C NMR and <sup>15</sup> N HMBS spectra of compounds <b>2-5</b> |
| <sup>1</sup> H and <sup>13</sup> C NMR spectra of compounds <b>6-9</b>                       |
| Mass spectrometry data of compounds <b>1a</b> , <b>1b</b> , <b>6-9</b>                       |

# HPLC and mass spectrometry data

IBCH RAS

Project Name Defaults

Reported by User: Breeze user (Breeze)

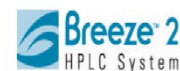

## SAMPLE INFORMATION

|                   |               |                  |                           |
|-------------------|---------------|------------------|---------------------------|
| Sample Name:      | Fleximer (2)  | Acquired By:     | Breeze                    |
| Sample Type:      | Unknown       | Date Acquired:   | 20.03.2023 18:54:10 GMT-4 |
| Vial:             | 1             | Acq. Method:     | 100B_dual_230nm_05ml      |
| Injection #:      | 2             | Date Processed:  | 20.03.2023 19:15:34 GMT-4 |
| Injection Volume: | 20,00 ul      | Channel Name:    | W2489 ChB                 |
| Run Time:         | 20,00 Minutes | Channel Desc.:   | W2489 ChB 254nm           |
| Column Type:      |               | Sample Set Name: |                           |

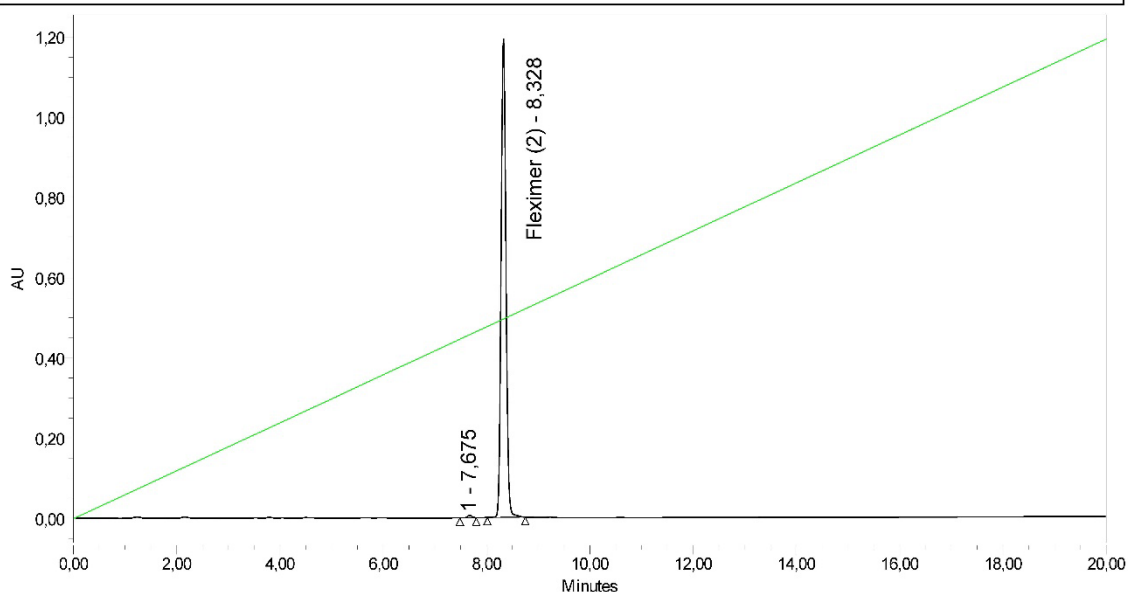

|   | Peak Name    | RT (min) | Area (μV*sec) | % Area | Height (μV) | % Height |
|---|--------------|----------|---------------|--------|-------------|----------|
| 1 | Peak 1       | 7,675    | 35388         | 0,46   | 5740        | 0,48     |
| 2 | Fleximer (2) | 8,328    | 7637798       | 99,54  | 1194687     | 99,52    |

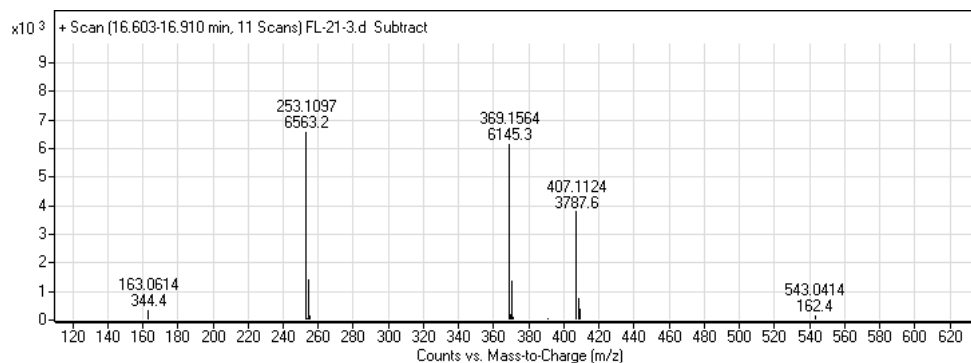

1-(β-D-2'-Deoxyribofuranosyl)-4-(4-benzoyloxypyrimidin-5-yl)pyrazole (2)

## SAMPLE INFORMATION

Sample Name: Fleximer (3)  
 Sample Type: Unknown  
 Vial: 1  
 Injection #: 1  
 Injection Volume: 15,00 µl  
 Run Time: 20,00 Minutes  
 Column Type:

Acquired By: Breeze  
 Date Acquired: 02.03.2023 13:40:20 GMT-4  
 Acq. Method: 100B\_dual\_230nm\_05ml  
 Date Processed: 20.03.2023 18:59:13 GMT-4  
 Channel Name: W2489 ChB  
 Channel Desc.: W2489 ChB 254nm  
 Sample Set Name:

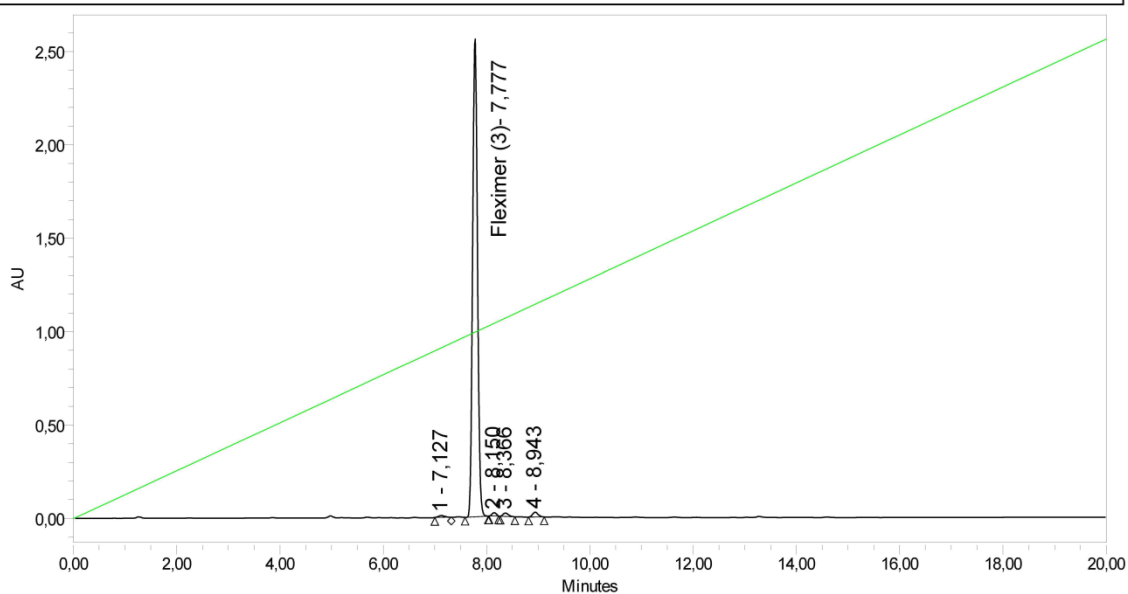

|   | Peak Name    | RT (min) | Area (µV*sec) | % Area | Height (µV) | % Height |
|---|--------------|----------|---------------|--------|-------------|----------|
| 1 | 1            | 7,127    | 81342         | 0,48   | 9355        | 0,35     |
| 2 | Fleximer (3) | 7,777    | 16480090      | 97,03  | 2567521     | 97,29    |
| 3 | 2            | 8,150    | 100170        | 0,59   | 17952       | 0,68     |
| 4 | 3            | 8,366    | 129334        | 0,76   | 17959       | 0,68     |
| 5 | 4            | 8,943    | 194086        | 1,14   | 26299       | 1,00     |

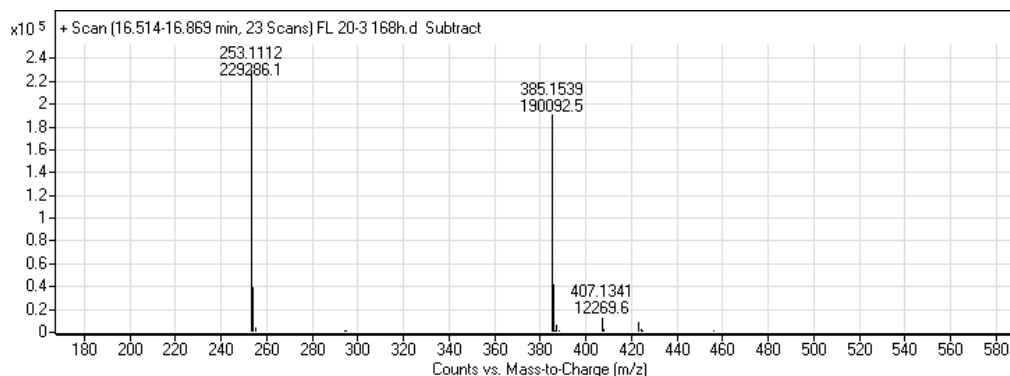

1-(β-D-Ribofuranosyl)-4-(4-benzoyloxypyrimidin-5-yl)pyrazole (3)

## SAMPLE INFORMATION

|                   |               |                  |                           |
|-------------------|---------------|------------------|---------------------------|
| Sample Name:      | Fleximer (4)  | Acquired By:     | Breeze                    |
| Sample Type:      | Unknown       | Date Acquired:   | 01.06.2023 16:22:01 GMT-4 |
| Vial:             | 1             | Acq. Method:     | 100B_dual_230nm_05ml      |
| Injection #:      | 1             | Date Processed:  | 01.06.2023 16:50:42 GMT-4 |
| Injection Volume: | 10,00 ul      | Channel Name:    | W2489 ChB                 |
| Run Time:         | 20,00 Minutes | Channel Desc.:   | W2489 ChB 254nm           |
| Column Type:      |               | Sample Set Name: |                           |

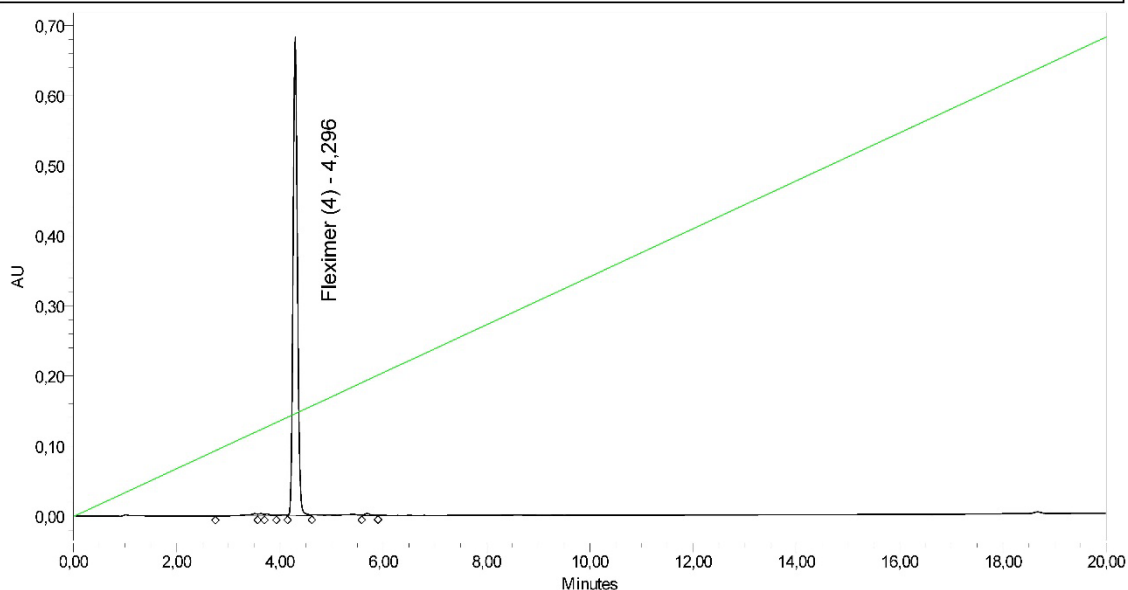

|   | Peak Name    | RT (min) | Area (μV*sec) | % Area | Height (μV) | % Height |
|---|--------------|----------|---------------|--------|-------------|----------|
| 1 | 1            | 3,516    | 54322         | 1,31   | 3309        | 0,48     |
| 2 | 2            | 3,628    | 23993         | 0,58   | 3531        | 0,51     |
| 3 | 3            | 3,747    | 23156         | 0,56   | 2950        | 0,42     |
| 4 | Fleximer (4) | 4,296    | 4011516       | 96,84  | 682065      | 98,12    |
| 5 | 5            | 5,690    | 29295         | 0,71   | 3246        | 0,47     |

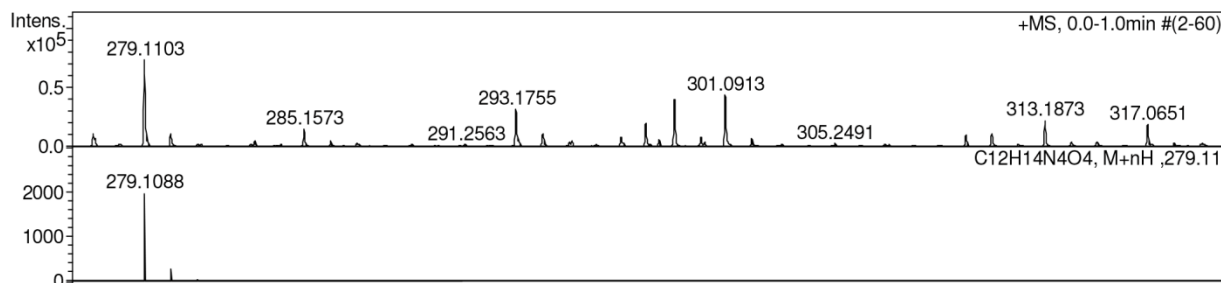

1-(β-D-2'-Deoxyribofuranosyl)-4-(pyrimidin-4(3*H*)-on-5-yl)pyrazole (4)

## SAMPLE INFORMATION

|                   |               |                  |                           |
|-------------------|---------------|------------------|---------------------------|
| Sample Name:      | Fleximer (5)  | Acquired By:     | Breeze                    |
| Sample Type:      | Unknown       | Date Acquired:   | 29.11.2022 17:06:42 GMT-4 |
| Vial:             | 31            | Acq. Method:     | 50B_dual_280_05ml         |
| Injection #:      | 1             | Date Processed:  | 14.06.2023 13:29:44 GMT-4 |
| Injection Volume: | 10,00 ul      | Channel Name:    | W2489 ChB                 |
| Run Time:         | 18,00 Minutes | Channel Desc.:   | W2489 ChB 280nm           |
| Column Type:      |               | Sample Set Name: | Fleximers                 |

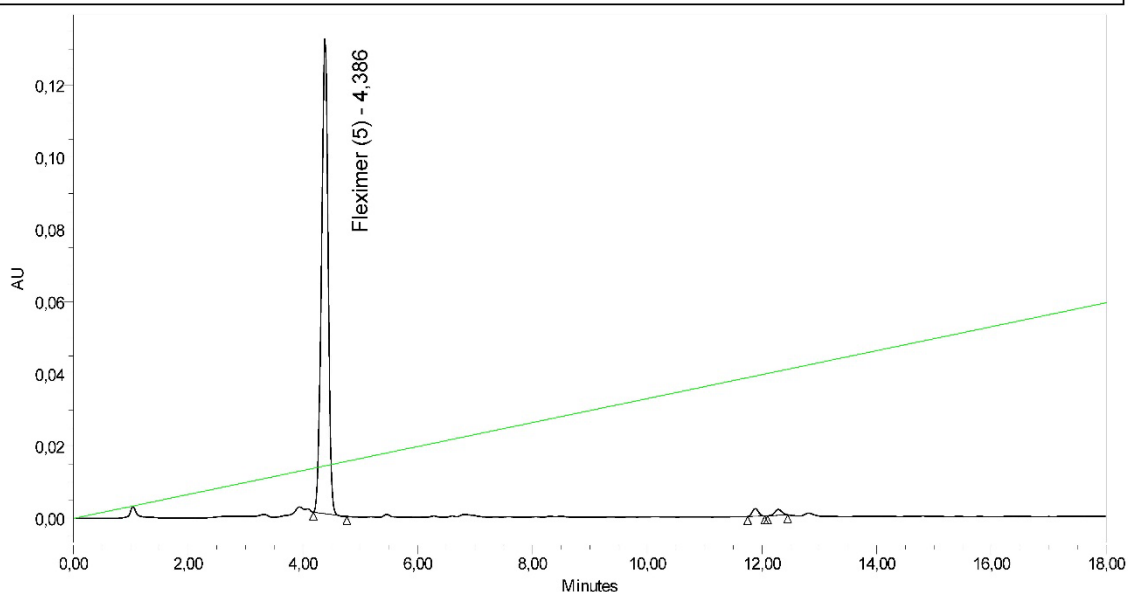

|   | Peak Name    | RT (min) | Area (μV*sec) | % Area | Height (μV) | % Height |
|---|--------------|----------|---------------|--------|-------------|----------|
| 1 | Fleximer (5) | 4,386    | 1049920       | 97,16  | 131302      | 97,18    |
| 2 | 3            | 11,884   | 16271         | 1,51   | 2141        | 1,59     |
| 3 | 4            | 12,286   | 14453         | 1,34   | 1664        | 1,23     |

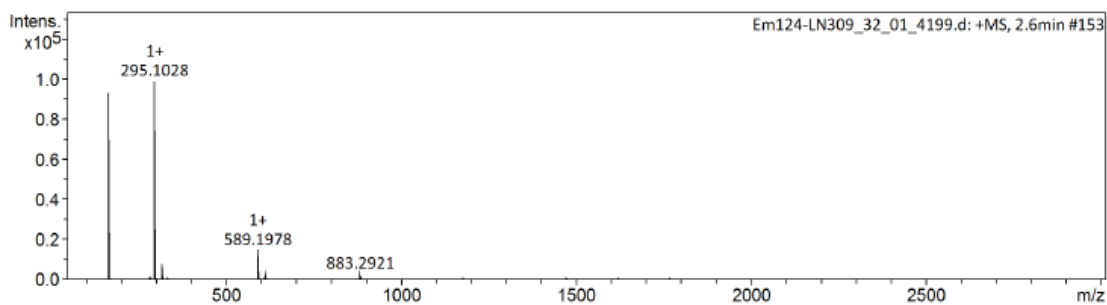1-(β-D-Ribofuranosyl)-4-(pyrimidin-4(3*H*)-on-5-yl)pyrazole (5)

# HPLC of side products from transglycosylation reaction mixture (fleximer riboside synthesis)

IBCH RAS

Project Name Defaults

Reported by User: Breeze user (Breeze)

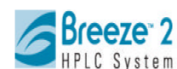

## SAMPLE INFORMATION

|                   |               |                  |                           |
|-------------------|---------------|------------------|---------------------------|
| Sample Name:      | FL-11/1 1h    | Acquired By:     | Breeze                    |
| Sample Type:      | Unknown       | Date Acquired:   | 24.05.2021 15:58:16 GMT-4 |
| Vial:             | 7             | Acq. Method:     | Fleximers_0_15B_10 min    |
| Injection #:      | 1             | Date Processed:  | 02.08.2023 13:42:16 GMT-4 |
| Injection Volume: | 10,00 ul      | Channel Name:    | W2489 ChB                 |
| Run Time:         | 15,00 Minutes | Channel Desc.:   | W2489 ChB 280nm           |
| Column Type:      |               | Sample Set Name: | Fleximers                 |

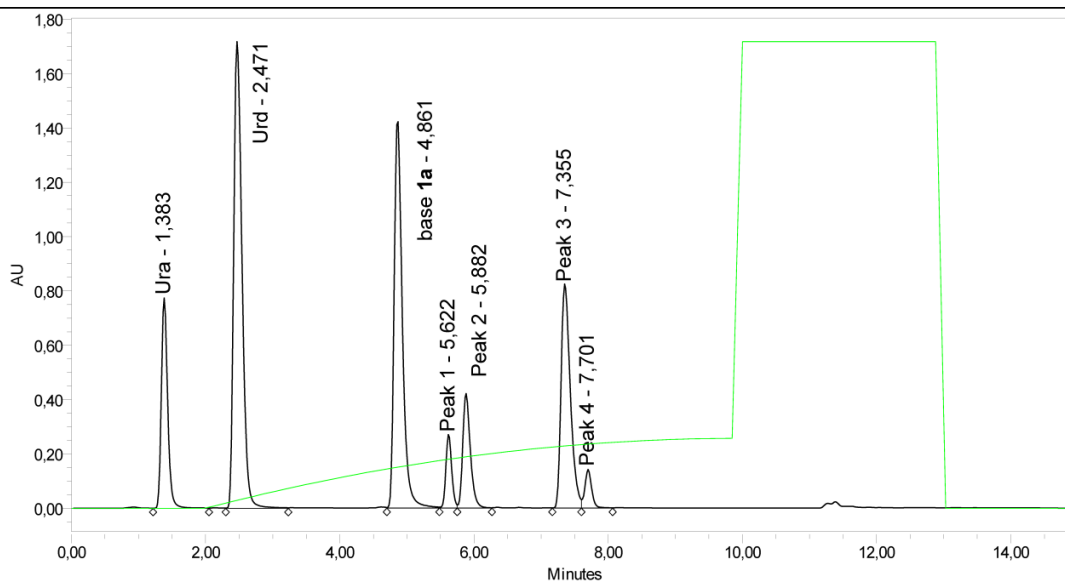

|   | Peak Name | RT (min) | Area (μV*sec) | % Area | Height (μV) | % Height |
|---|-----------|----------|---------------|--------|-------------|----------|
| 1 | Ura       | 1,383    | 5043469       | 11,01  | 769387      | 13,80    |
| 2 | Urd       | 2,471    | 14716294      | 32,14  | 1720877     | 30,86    |
| 3 | base 1a   | 4,861    | 12149922      | 26,53  | 1426226     | 25,58    |
| 4 | Peak 1    | 5,622    | 1632296       | 3,56   | 270525      | 4,85     |
| 5 | Peak 2    | 5,882    | 3334549       | 7,28   | 420576      | 7,54     |
| 6 | Peak 3    | 7,355    | 7906597       | 17,27  | 826918      | 14,83    |
| 7 | Peak 4    | 7,701    | 1008487       | 2,20   | 141244      | 2,53     |

Report Method: Gradient Overlay Report ASC

Page: 1 of 1

Printed: 02.08.2023

13:45:09 Etc/GMT-4

# HPLC of side products from transglycosylation reaction mixture (fleximer 2'-deoxyriboside synthesis)

IBCH RAS

Project Name Defaults

Reported by User: Breeze user (Breeze)

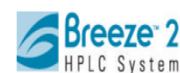

## SAMPLE INFORMATION

|                   |               |                  |                           |
|-------------------|---------------|------------------|---------------------------|
| Sample Name:      | FL-13/1 1h    | Acquired By:     | Breeze                    |
| Sample Type:      | Unknown       | Date Acquired:   | 24.05.2021 16:29:22 GMT-4 |
| Vial:             | 7             | Acq. Method:     | Fleximers_0_15B_10 min    |
| Injection #:      | 1             | Date Processed:  | 02.08.2023 13:51:27 GMT-4 |
| Injection Volume: | 10,00 ul      | Channel Name:    | W2489 ChB                 |
| Run Time:         | 15,00 Minutes | Channel Desc.:   | W2489 ChB 280nm           |
| Column Type:      |               | Sample Set Name: | Fleximers                 |

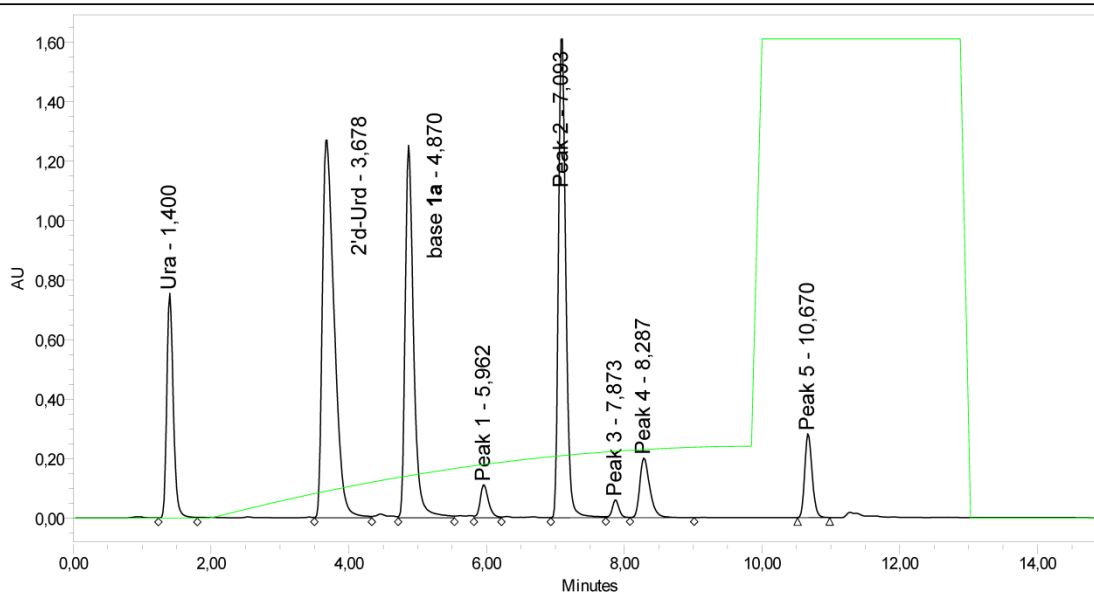

|   | Peak Name | RT (min) | Area (μV*sec) | % Area | Height (μV) | % Height |
|---|-----------|----------|---------------|--------|-------------|----------|
| 1 | Ura       | 1,400    | 4974523       | 10,30  | 751107      | 13,54    |
| 2 | 2'd-Urd   | 3,678    | 15205213      | 31,47  | 1272912     | 22,94    |
| 3 | base 1a   | 4,870    | 10682803      | 22,11  | 1251423     | 22,55    |
| 4 | Peak 1    | 5,962    | 938773        | 1,94   | 110914      | 2,00     |
| 5 | Peak 2    | 7,093    | 11945274      | 24,72  | 1619756     | 29,19    |
| 6 | Peak 3    | 7,873    | 417468        | 0,86   | 60052       | 1,08     |
| 7 | Peak 4    | 8,287    | 2045992       | 4,23   | 200852      | 3,62     |
| 8 | Peak 5    | 10,670   | 2102629       | 4,35   | 282025      | 5,08     |

## NMR spectra of compounds

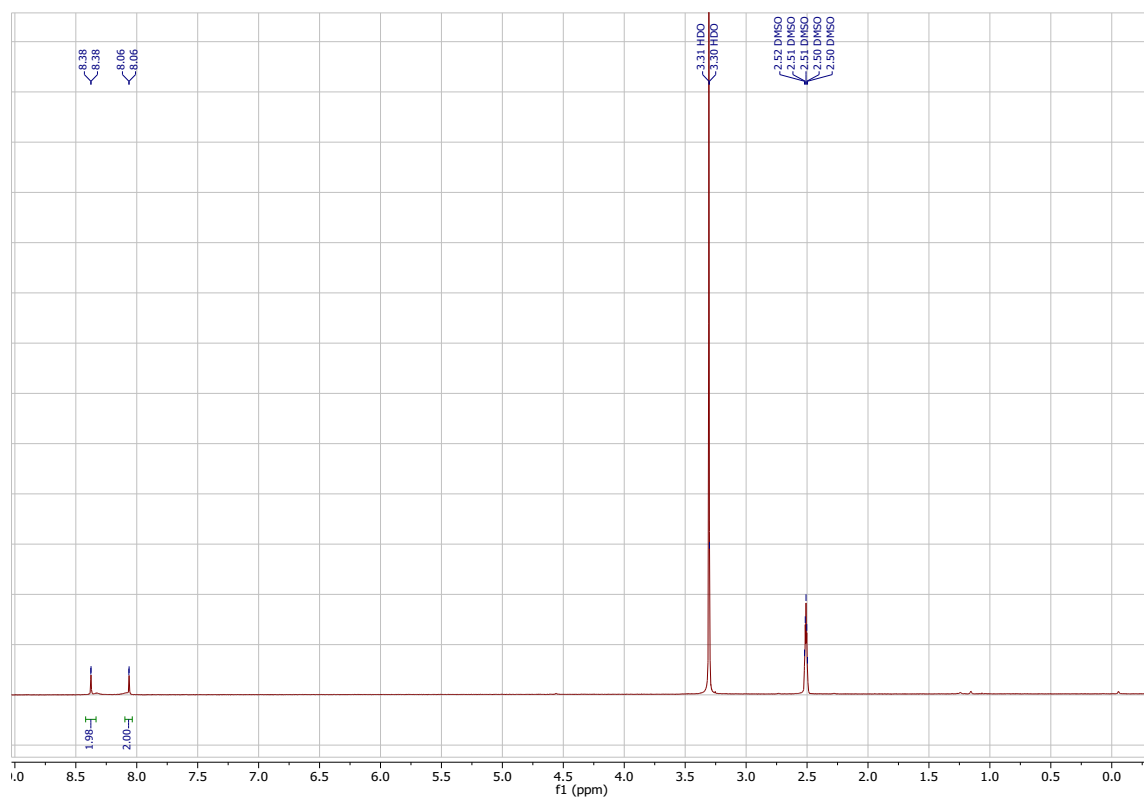

$^1\text{H}$  NMR spectrum of **1a** in  $\text{CD}_3\text{OD}$

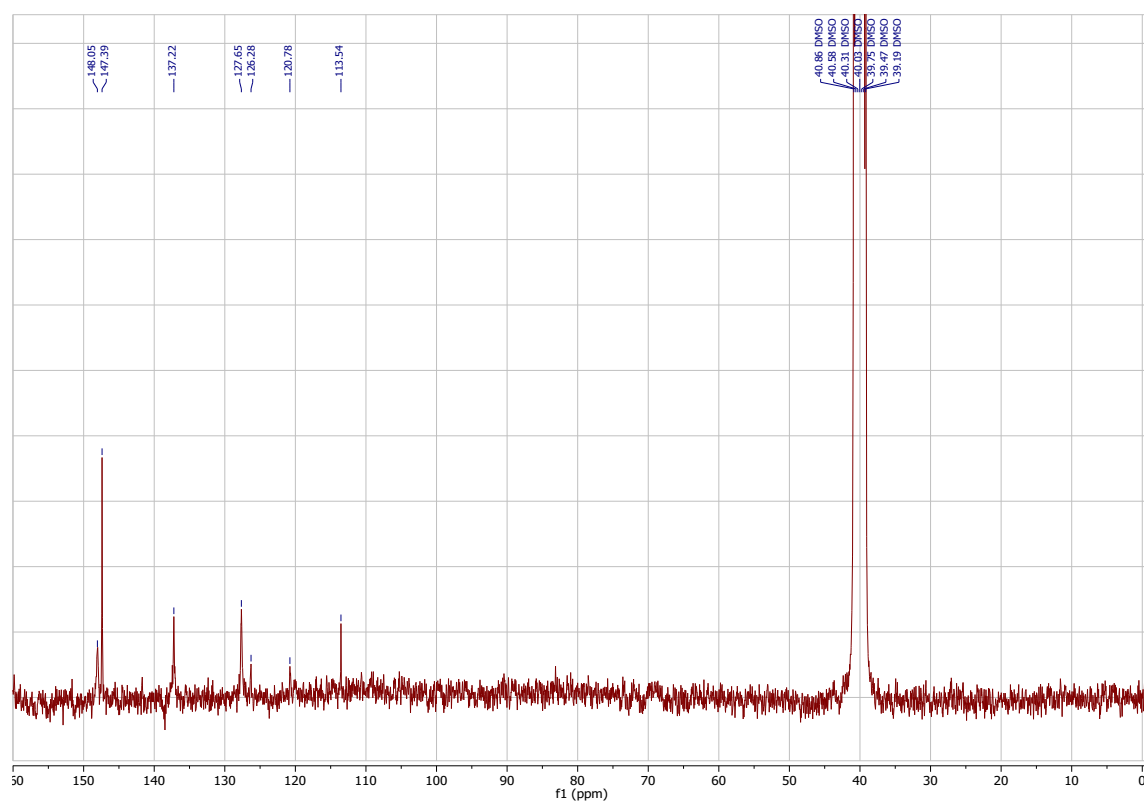

$^{13}\text{C}$  NMR spectrum of **1a** in  $\text{CD}_3\text{OD}$



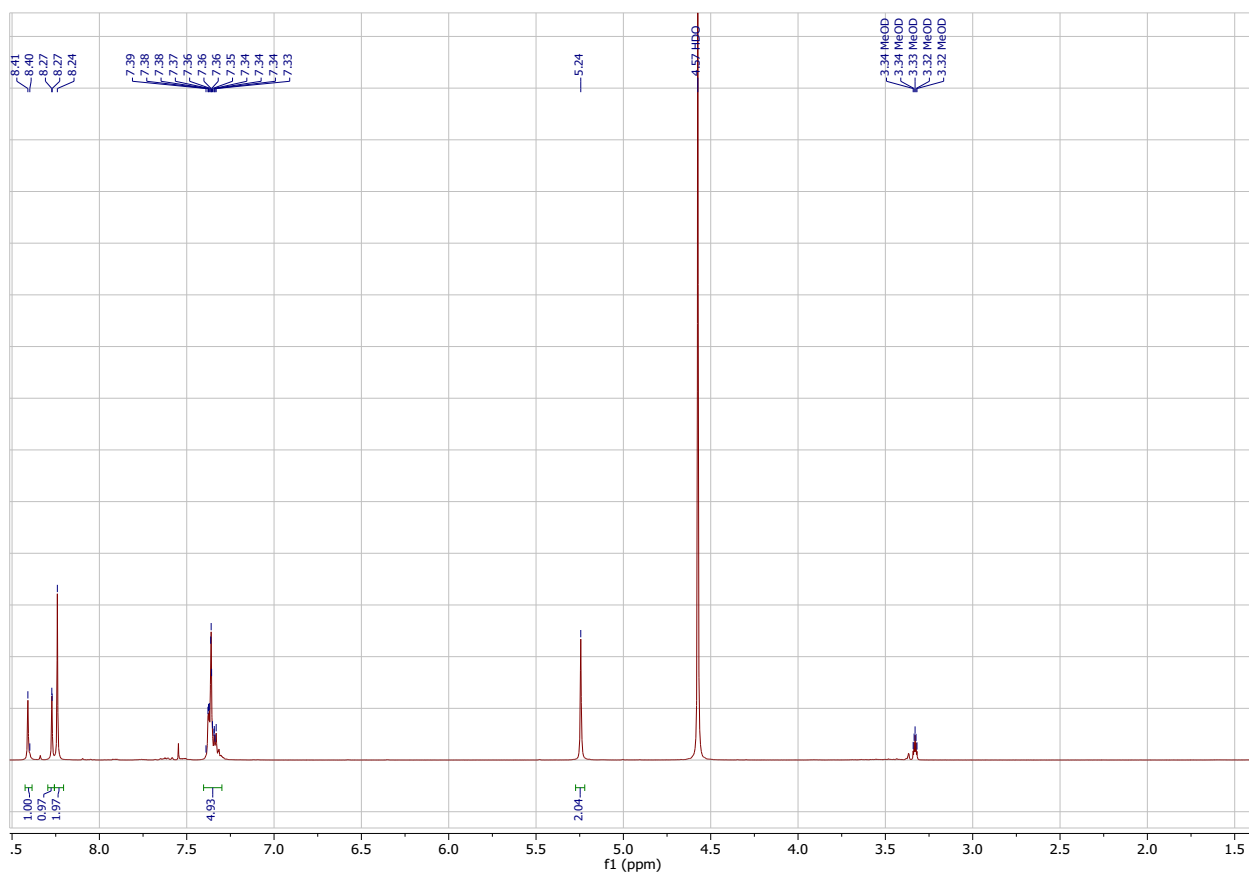

<sup>1</sup>H NMR spectrum of **1b** in CD<sub>3</sub>OD

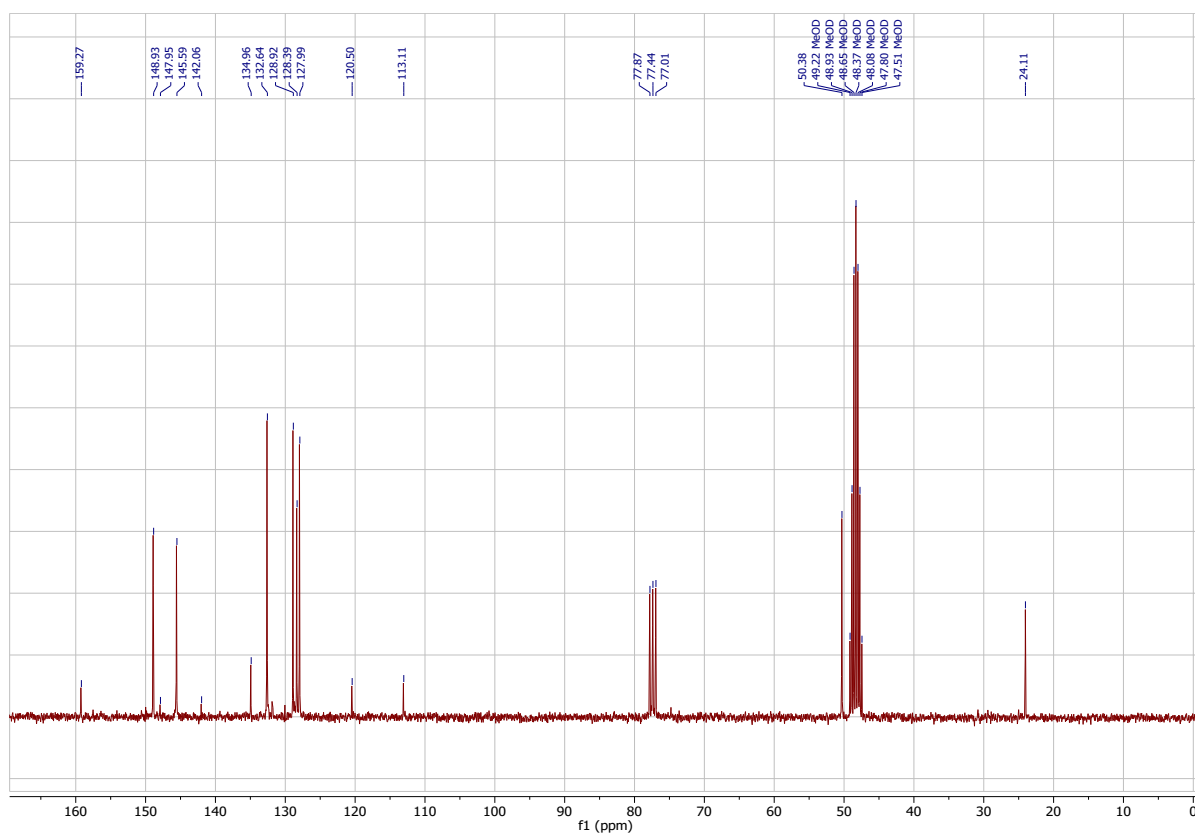

<sup>13</sup>C NMR spectrum of **1b** in CD<sub>3</sub>OD

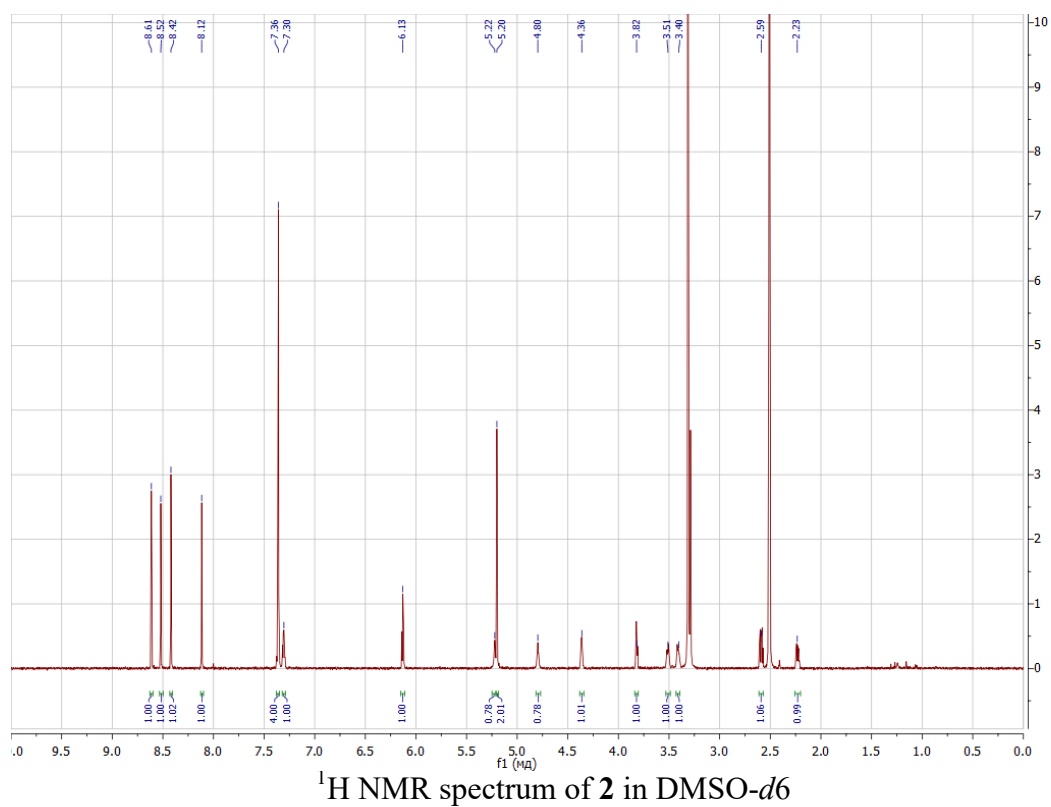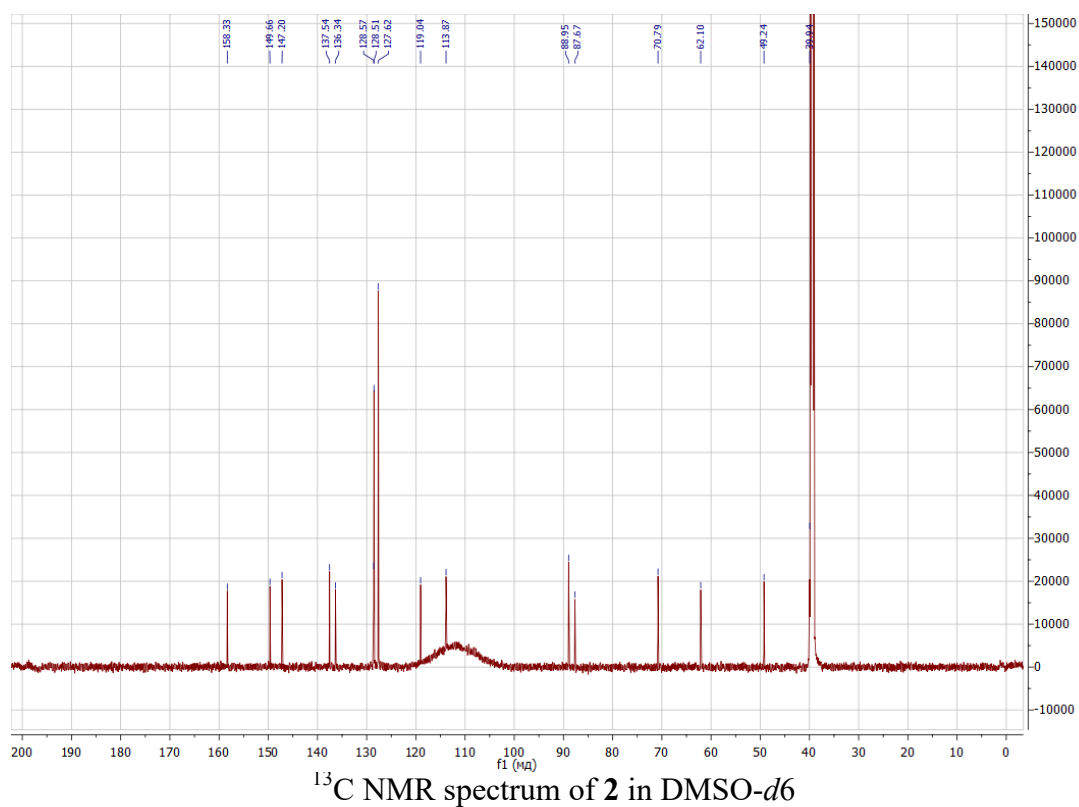

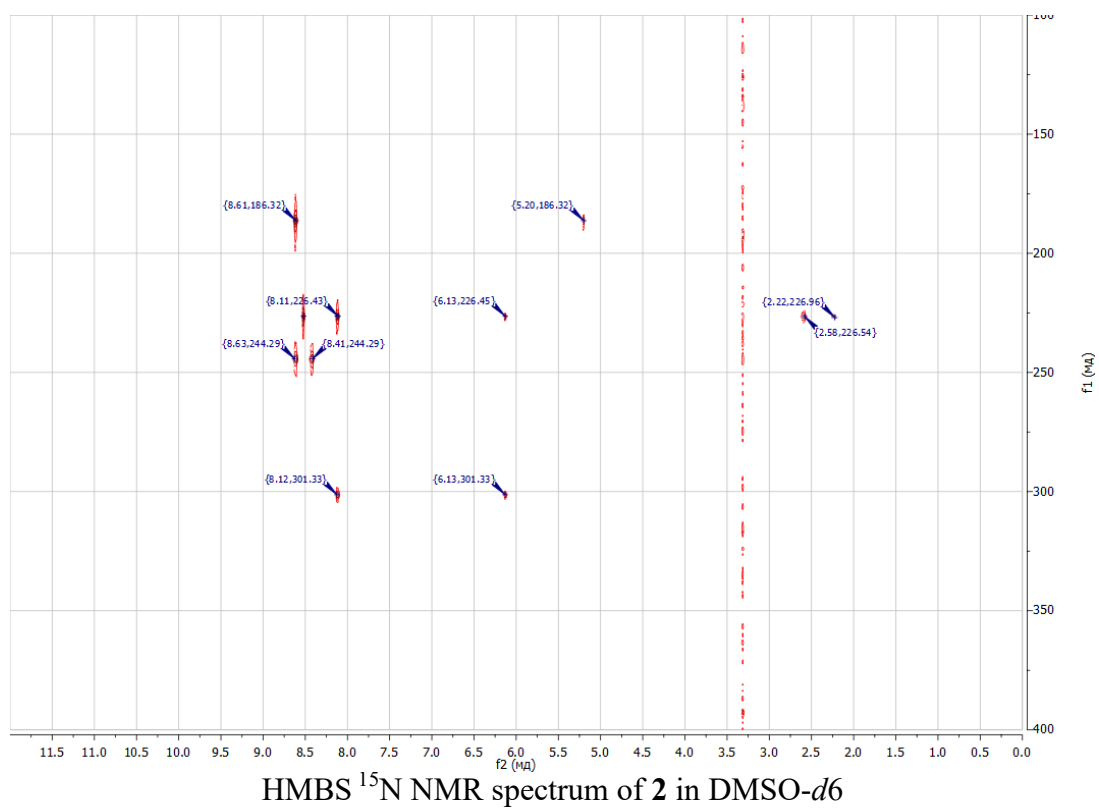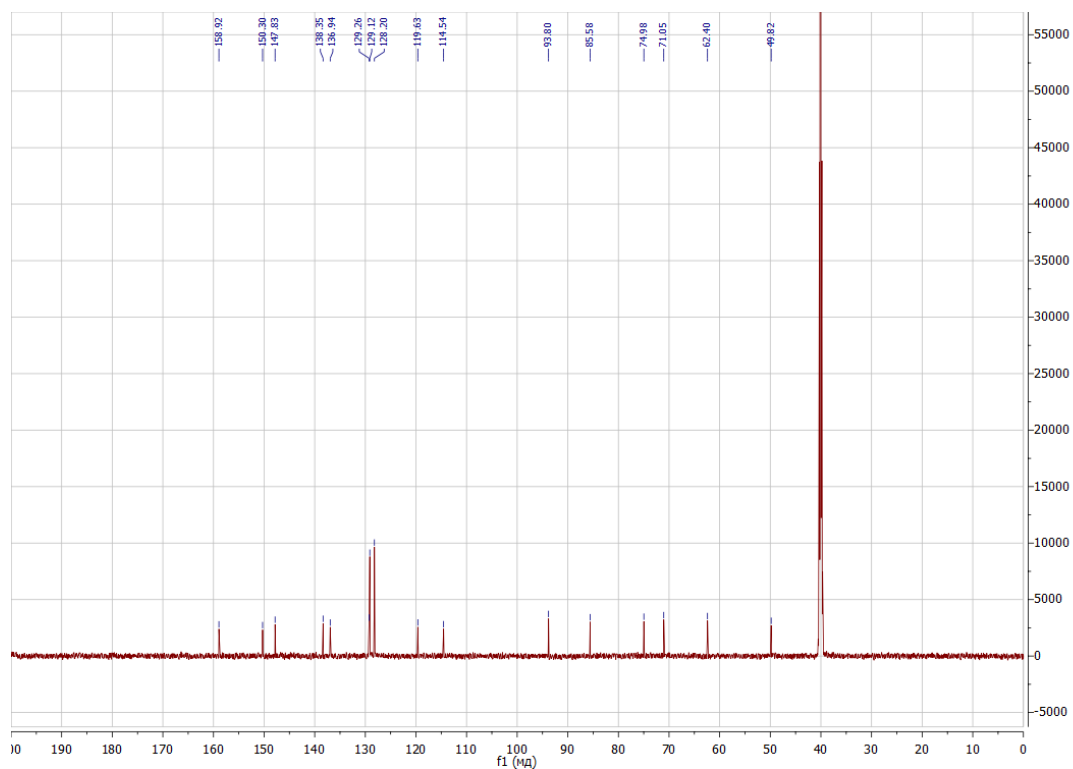

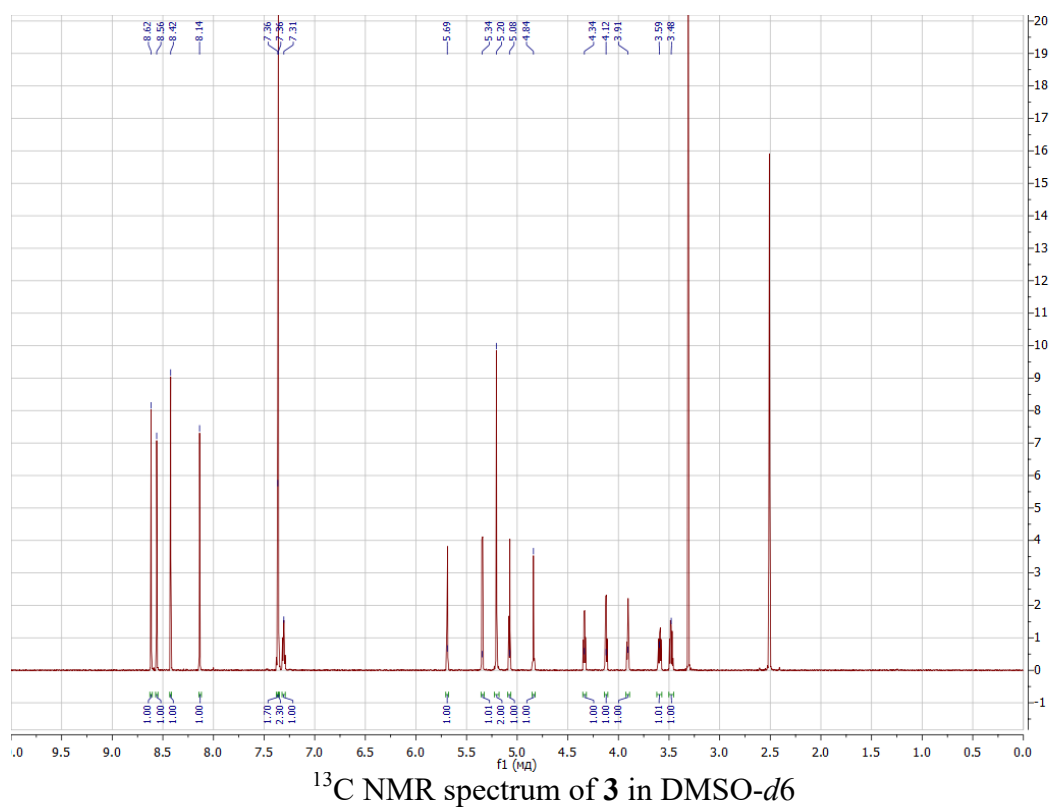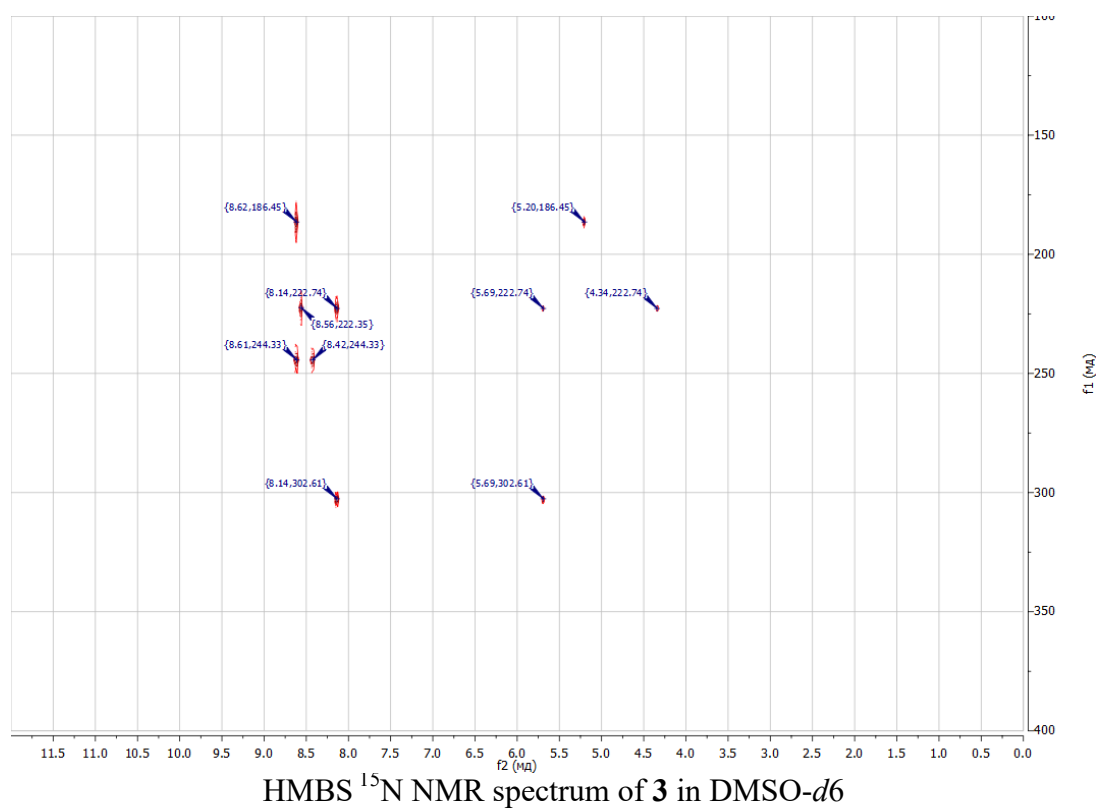

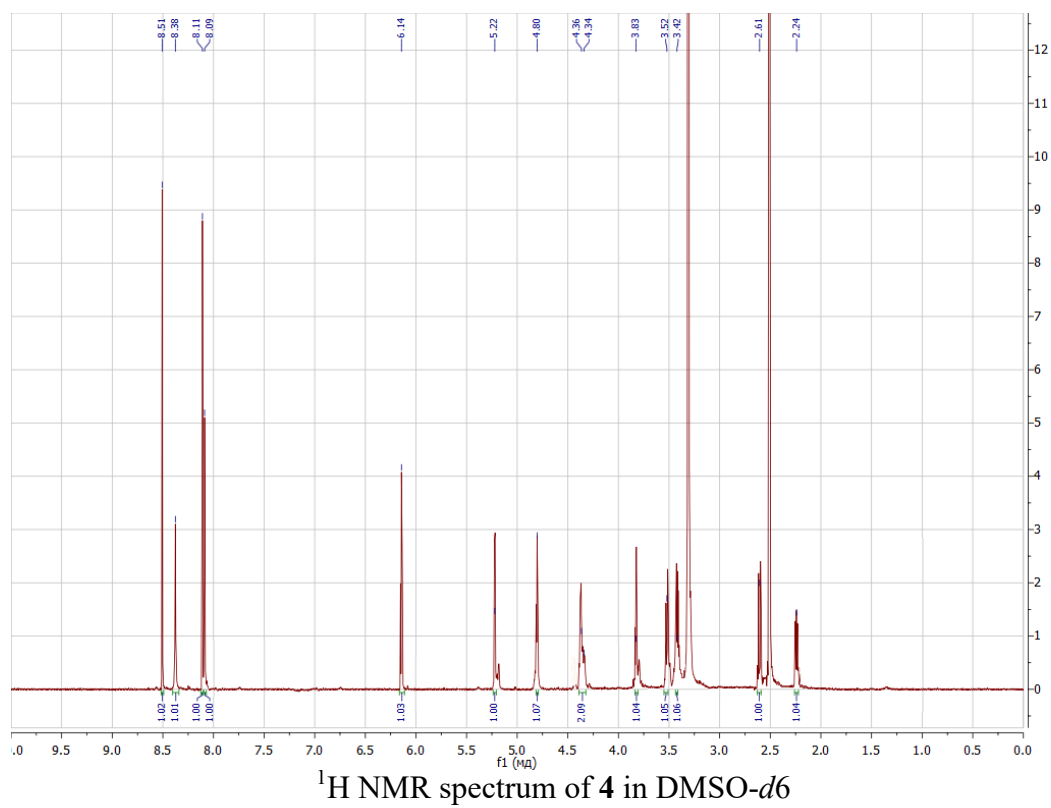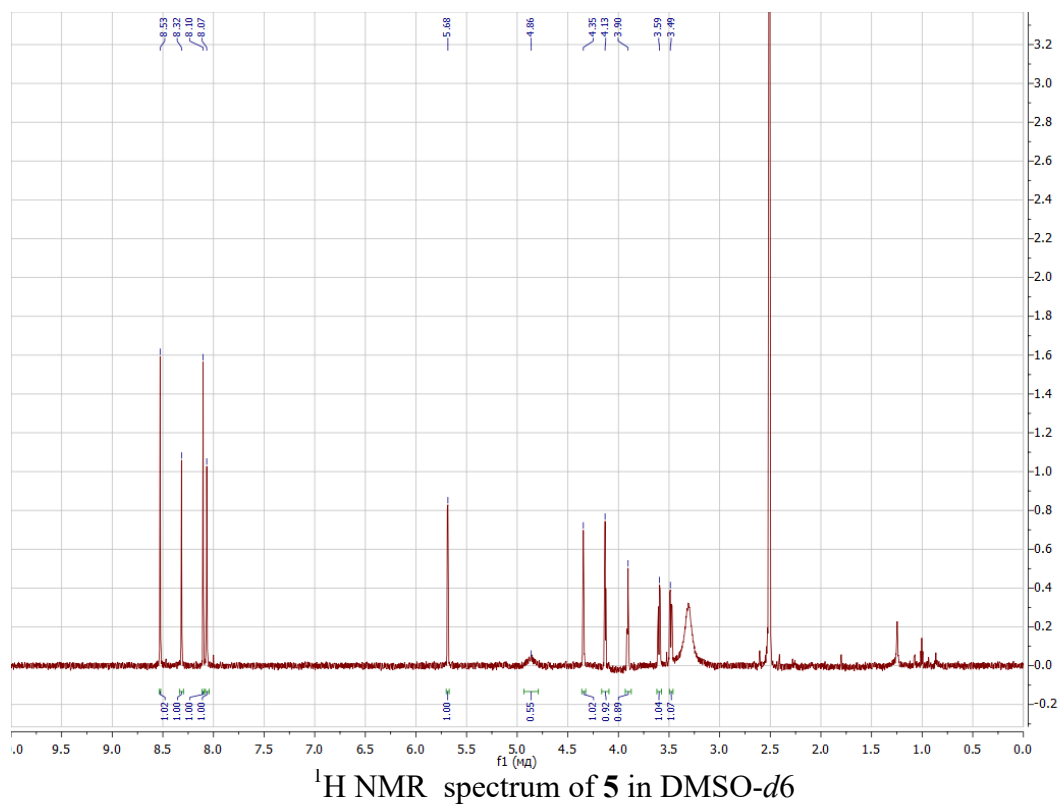

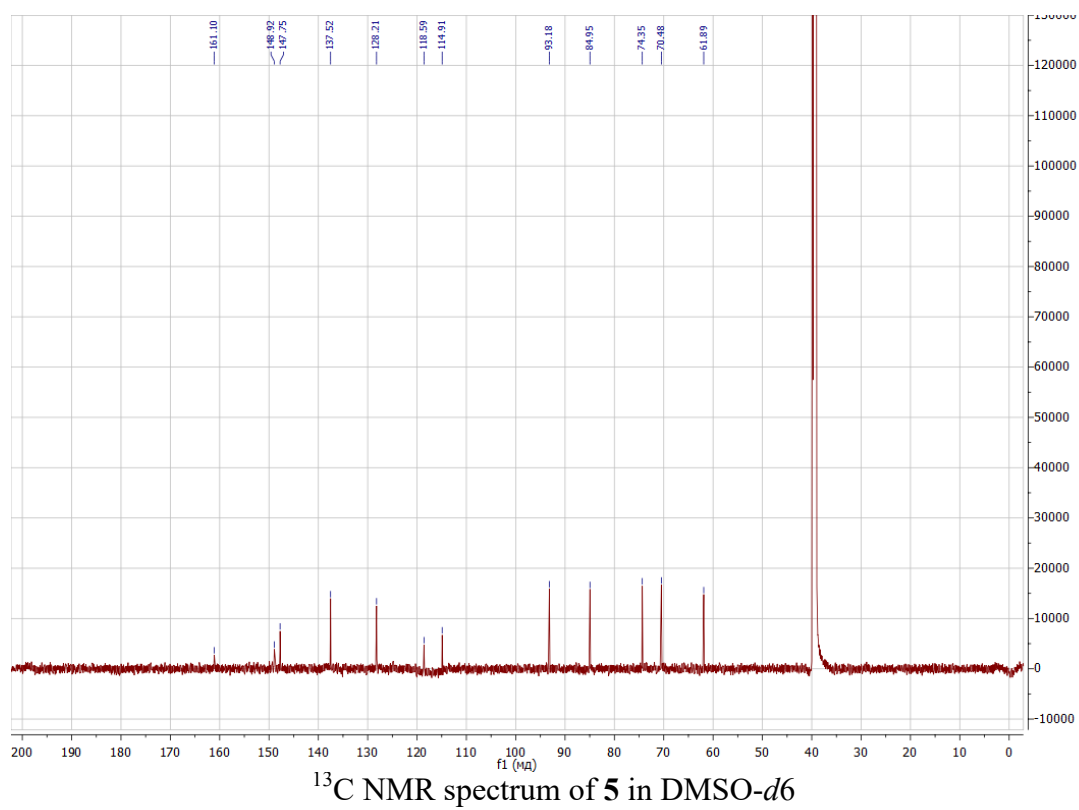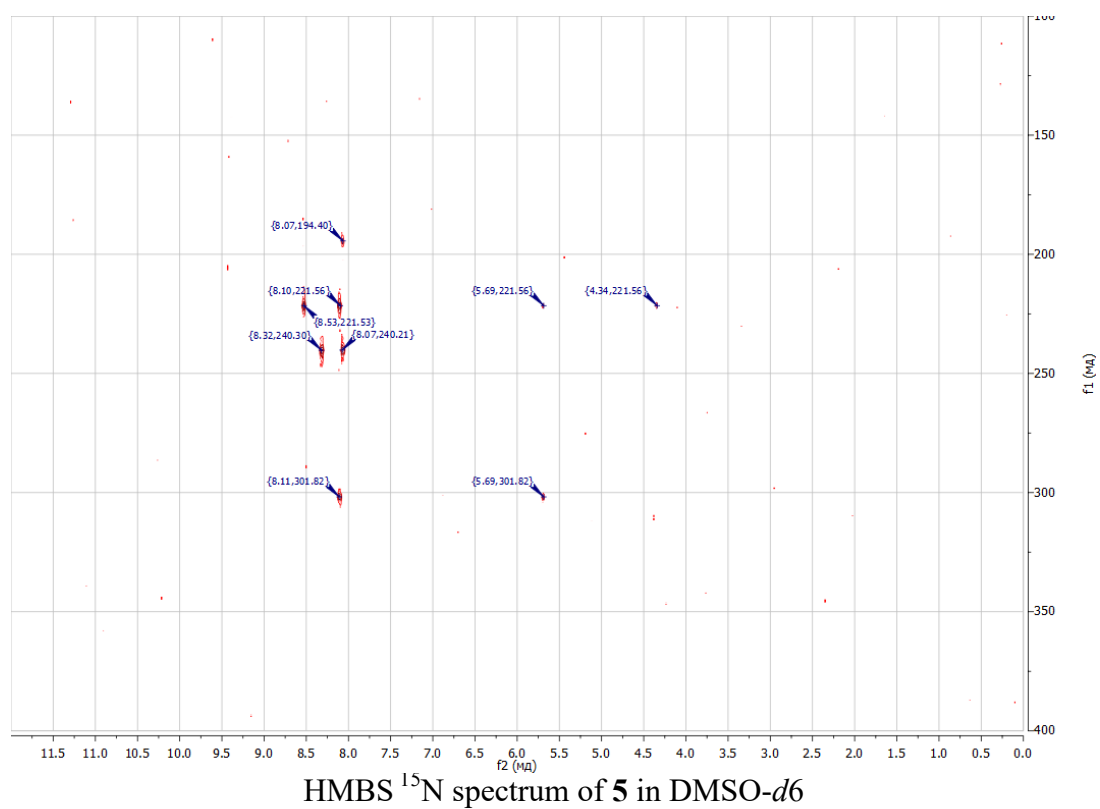

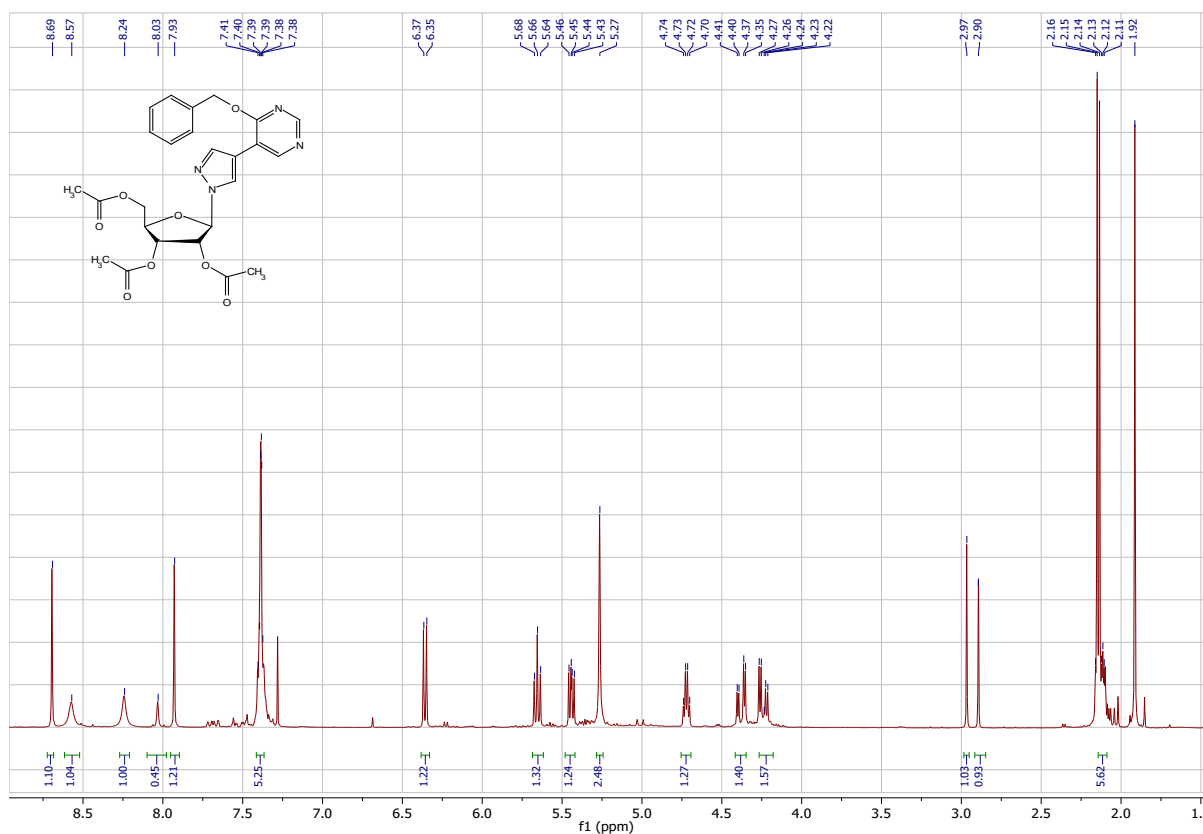

<sup>1</sup>H NMR spectrum of 1-(β-D-(2',3',5'-triacetylribofuranosyl))-4-(4-benzoyloxypyrimidin-5-yl)pyrazole in CDCl<sub>3</sub>

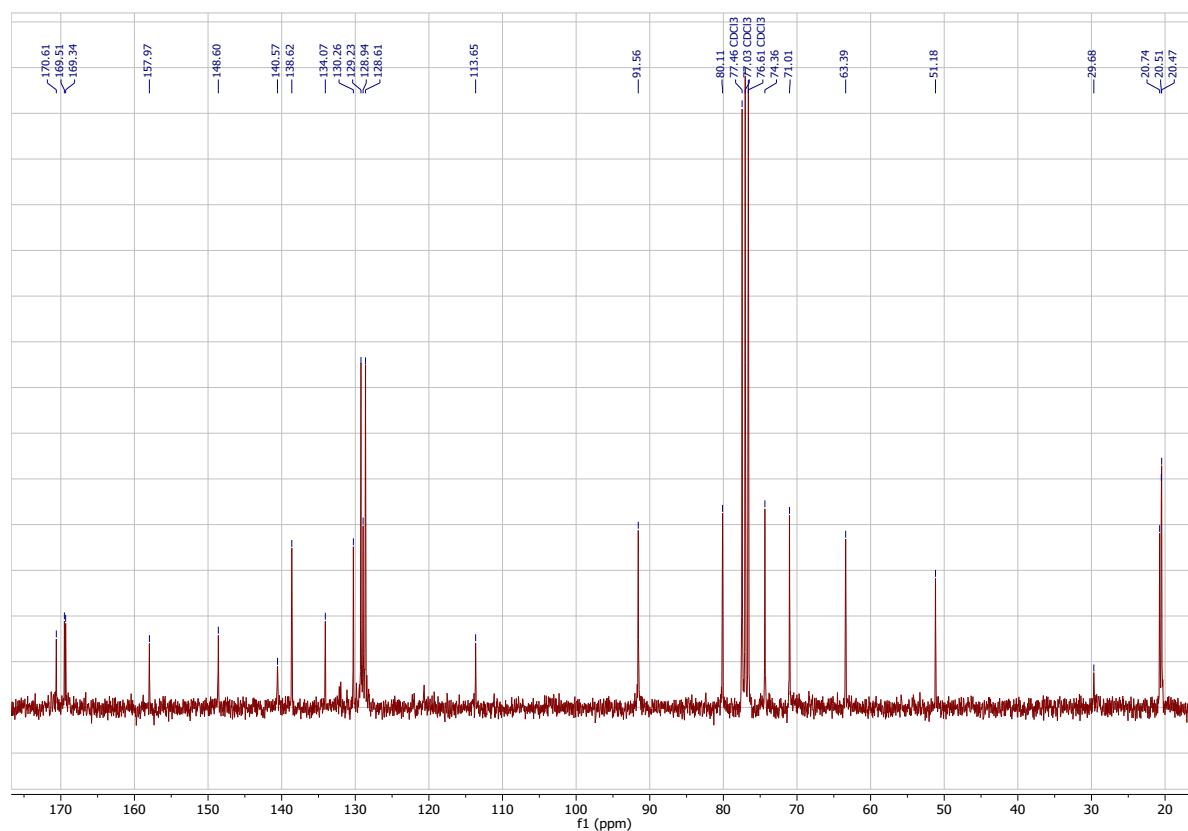

<sup>13</sup>C NMR spectrum of 1-(β-D-(2',3',5'-triacetylribofuranosyl))-4-(4-benzoyloxypyrimidin-5-yl)pyrazole in CDCl<sub>3</sub>

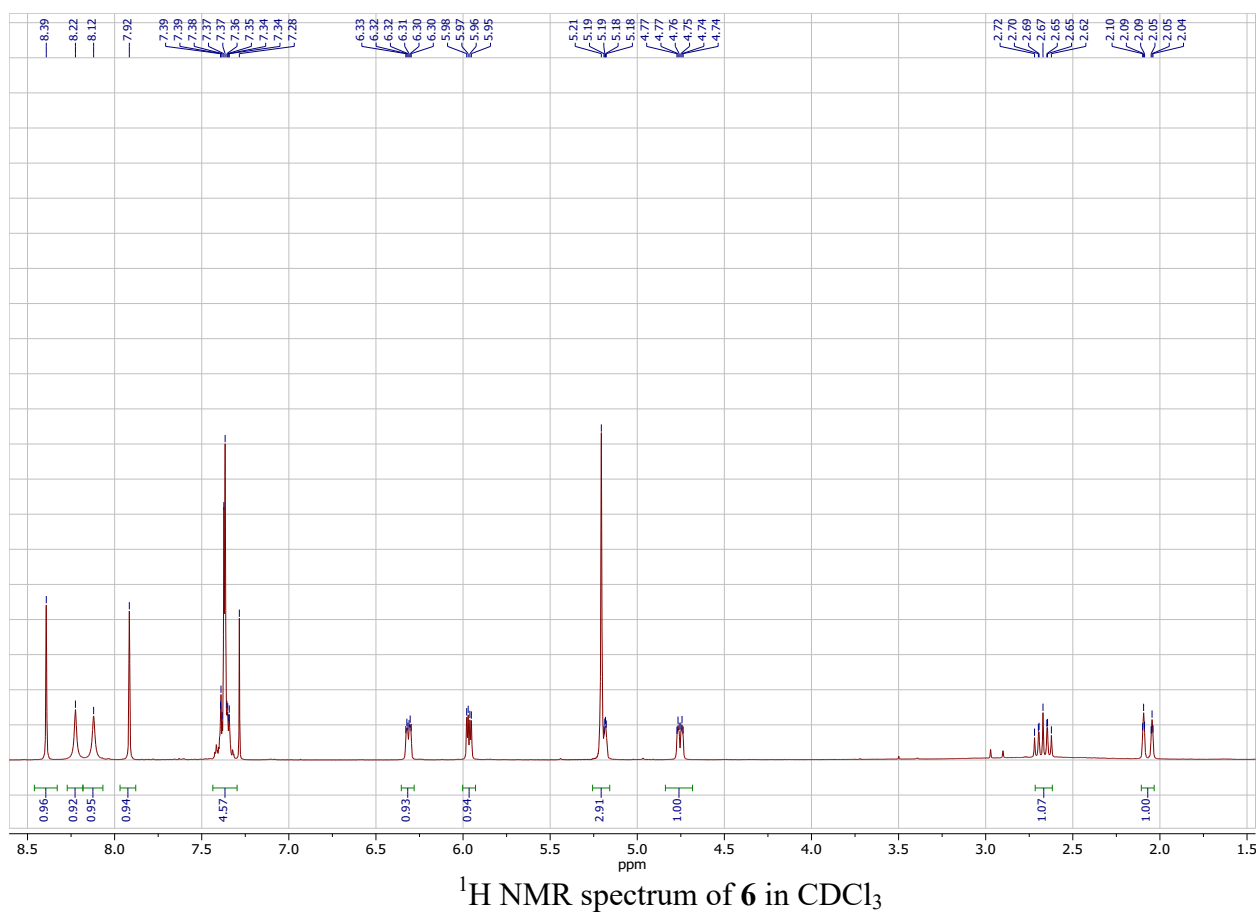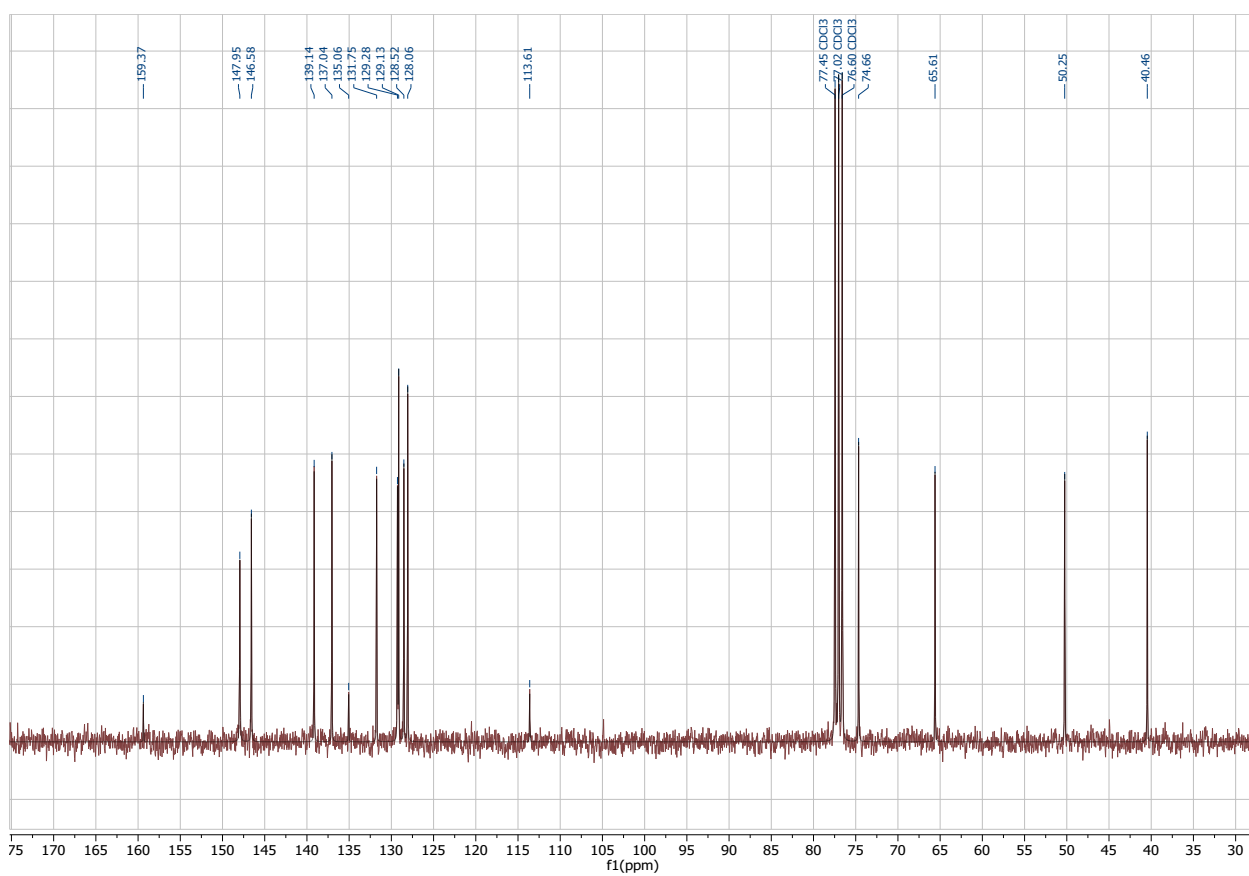

$^{13}\text{C}$  NMR spectrum of **6** in  $\text{CDCl}_3$



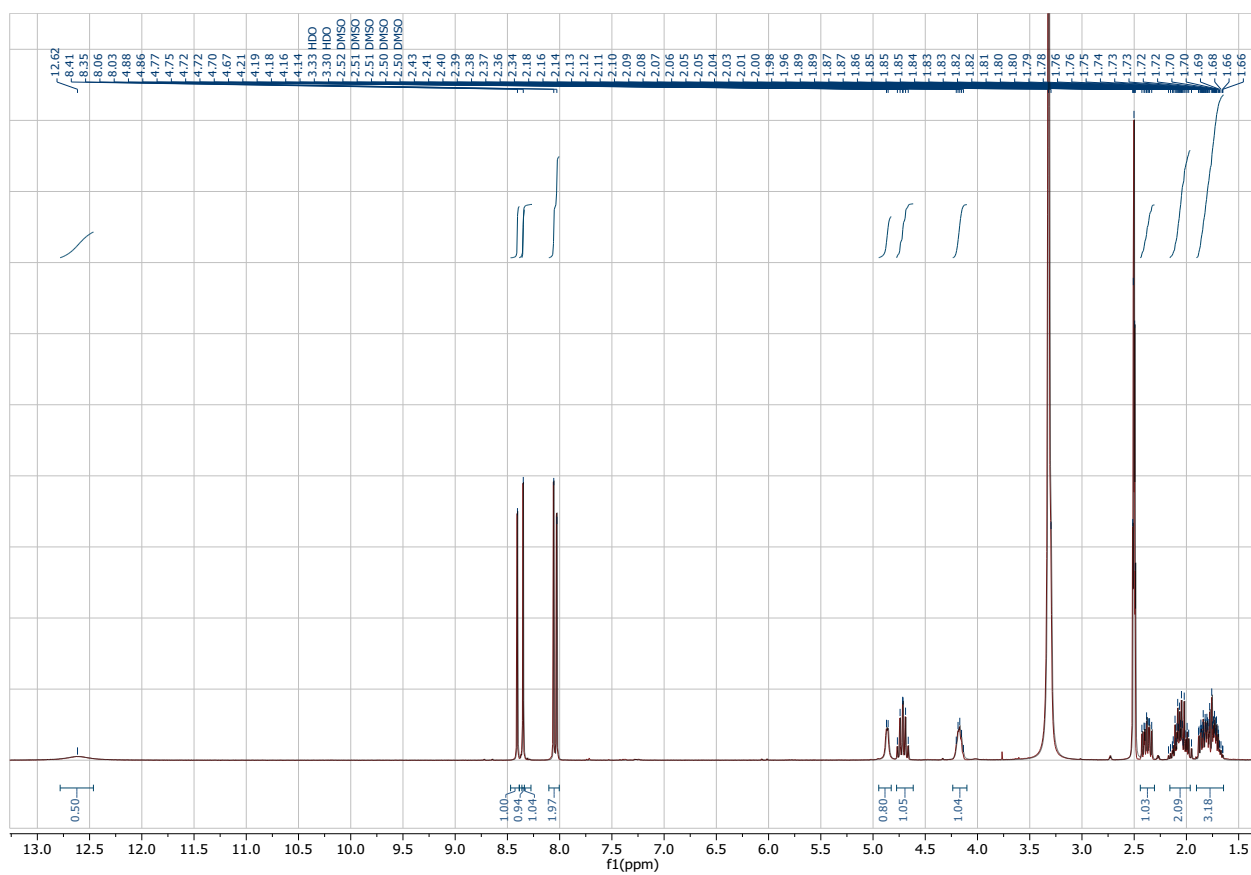

<sup>1</sup>H NMR spectrum of 7 in DMSO-*d*<sub>6</sub>

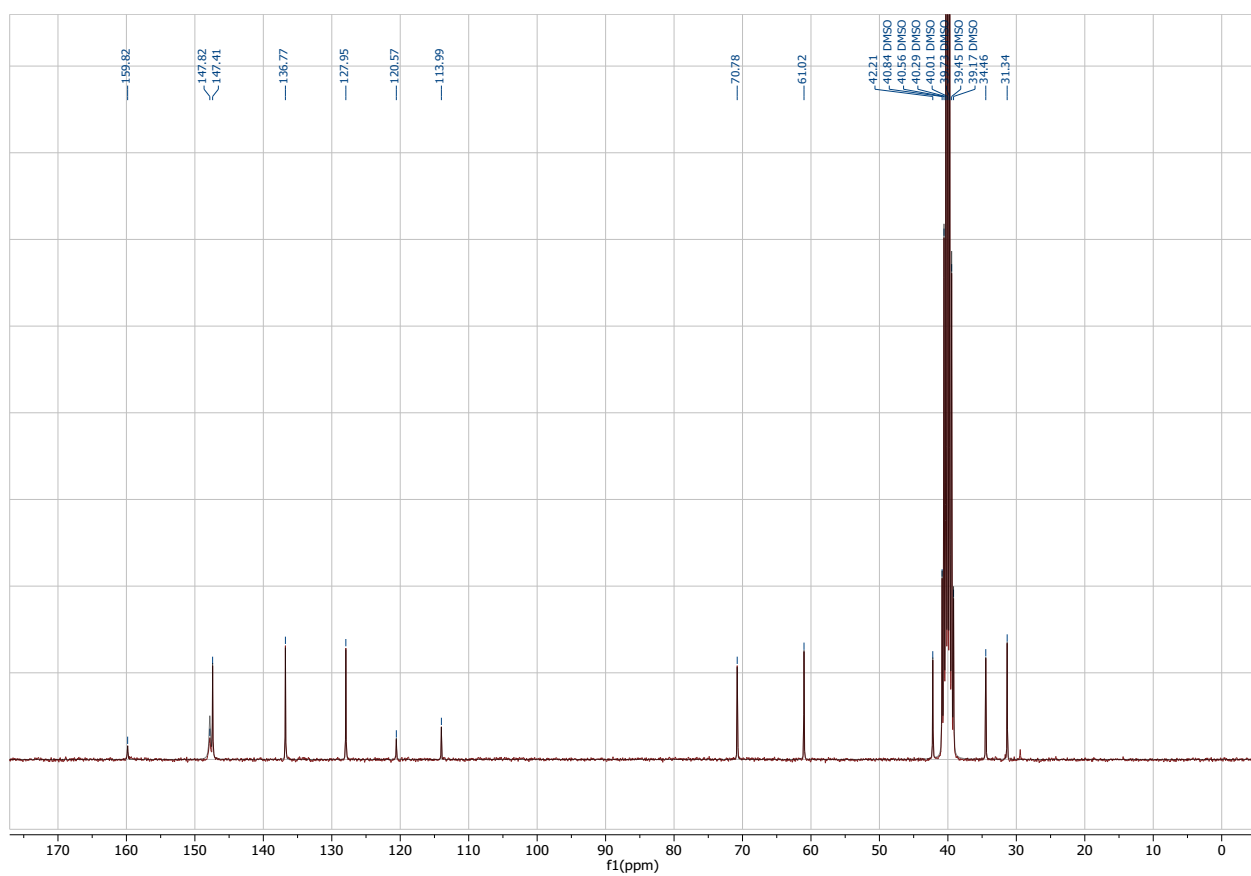

<sup>13</sup>C NMR spectrum of 7 in DMSO-*d*<sub>6</sub>

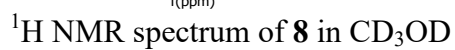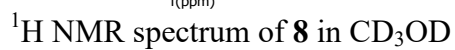

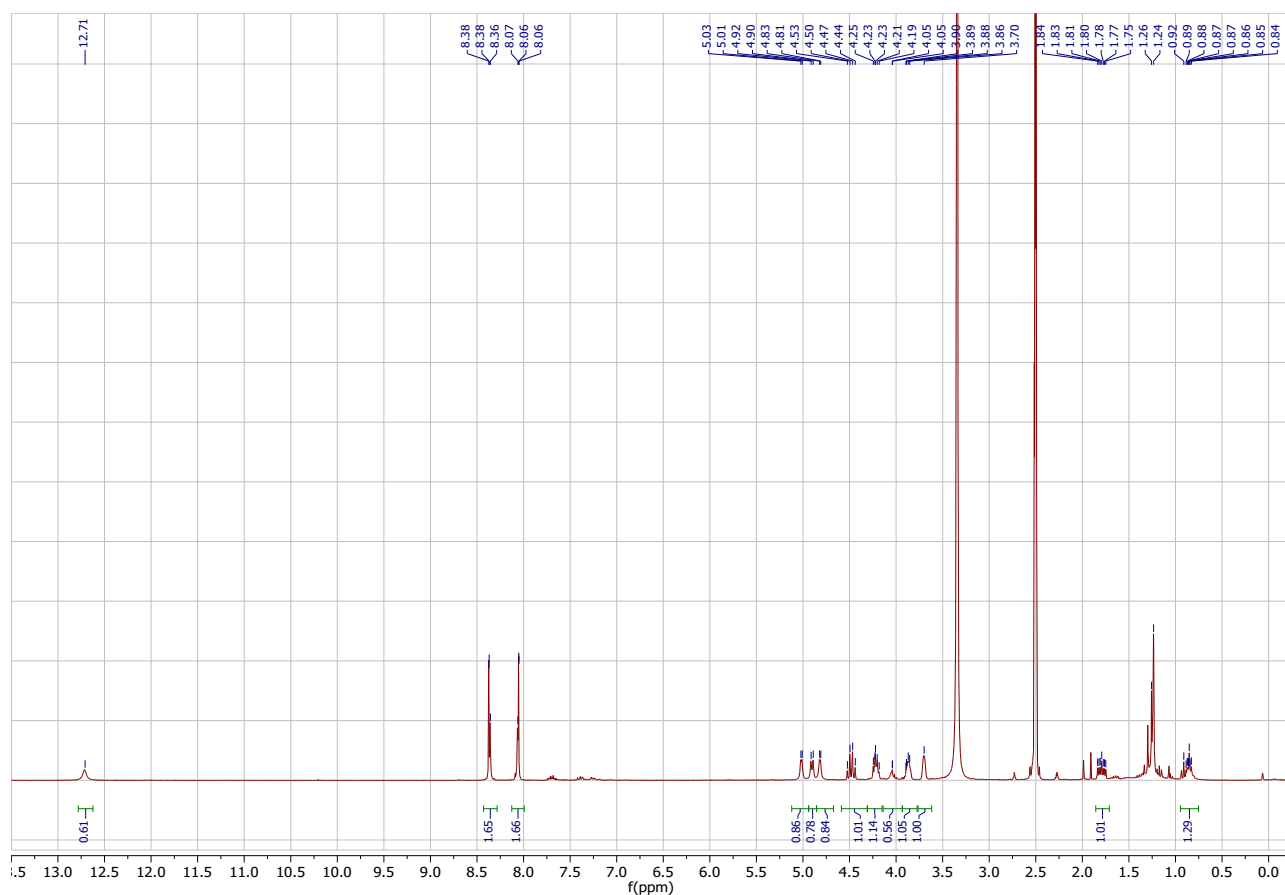

$^1\text{H}$  NMR spectrum of **9** in  $\text{DMSO}-d_6$

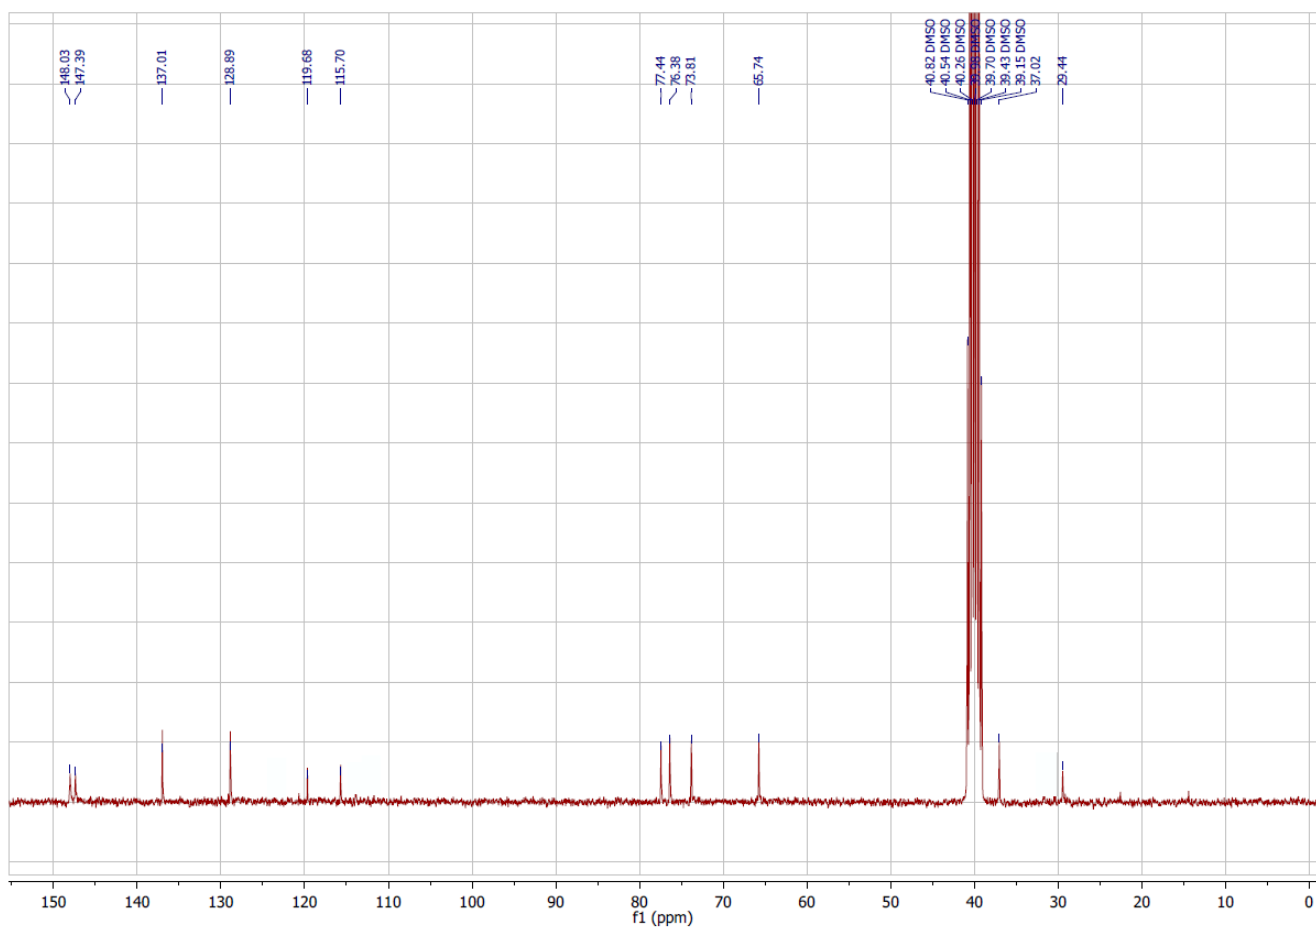

$^{13}\text{C}$  NMR spectrum of **9** in  $\text{DMSO}-d_6$

# HRMS spectrum of 1a

## Display Report

### Analysis Info

Analysis Name D:\Data\EM-98(LN-201)\_11\_01\_3659.d  
 Method la\_2.2\_small.m  
 Sample Name 1a  
 Comment

Acquisition Date 11/12/2020 3:05:57 PM

Operator BDAL@DE  
 Instrument compact 8255754.20088

### Acquisition Parameter

|             |          |                      |          |                  |           |
|-------------|----------|----------------------|----------|------------------|-----------|
| Source Type | ESI      | Ion Polarity         | Positive | Set Nebulizer    | 0.4 Bar   |
| Focus       | Active   | Set Capillary        | 4500 V   | Set Dry Heater   | 180 °C    |
| Scan Begin  | 50 m/z   | Set End Plate Offset | -500 V   | Set Dry Gas      | 6.0 l/min |
| Scan End    | 3000 m/z | Set Charging Voltage | 2000 V   | Set Divert Valve | Source    |
|             |          | Set Corona           | 0 nA     | Set APCI Heater  | 0 °C      |

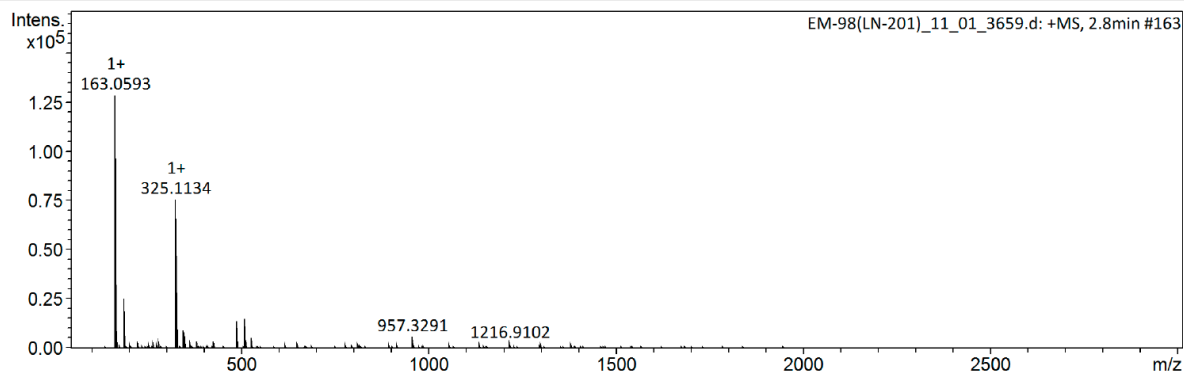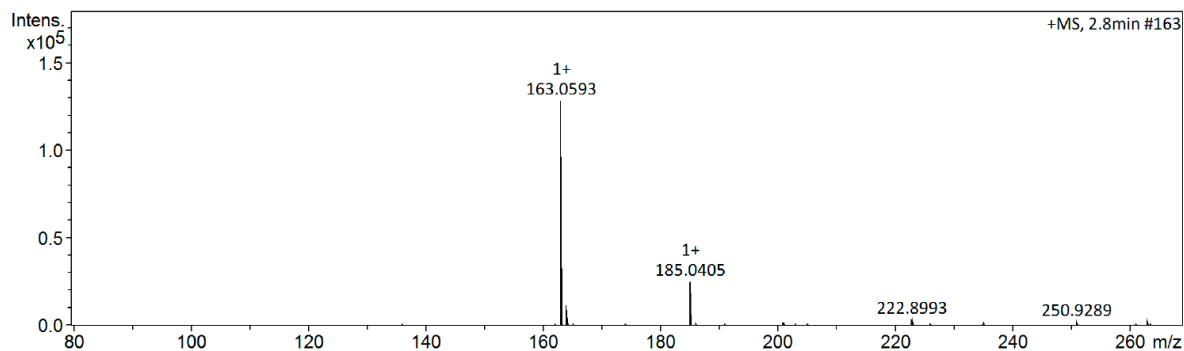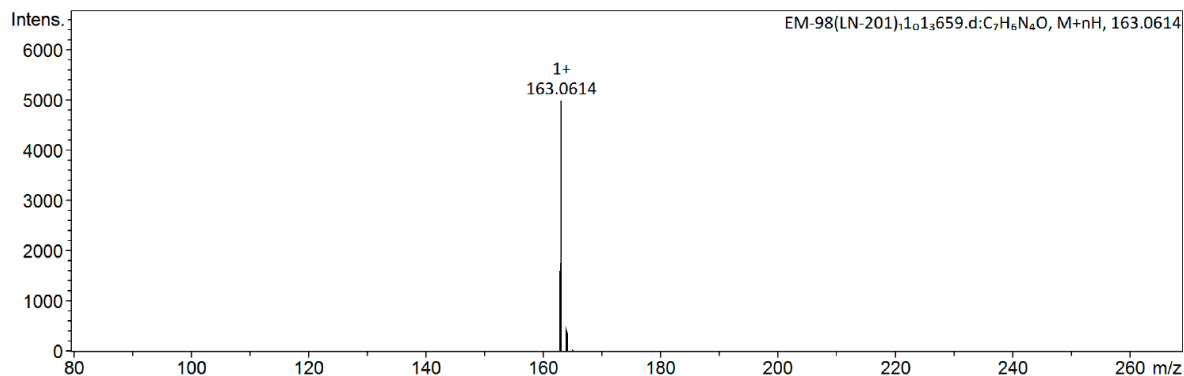

# HRMS spectrum of **1b**

## Display Report

### Analysis Info

Analysis Name D:\Data\Em-79(FB5)\_2\_01\_3328.d  
 Method la\_2.2\_small.m  
 Sample Name 1b  
 Comment

Acquisition Date 3/27/2020 2:41:34 PM

Operator BDAL@DE  
 Instrument compact 8255754.20088

### Acquisition Parameter

|             |          |                      |          |                  |           |
|-------------|----------|----------------------|----------|------------------|-----------|
| Source Type | ESI      | Ion Polarity         | Positive | Set Nebulizer    | 0.4 Bar   |
| Focus       | Active   | Set Capillary        | 4500 V   | Set Dry Heater   | 180 °C    |
| Scan Begin  | 50 m/z   | Set End Plate Offset | -500 V   | Set Dry Gas      | 6.0 l/min |
| Scan End    | 3000 m/z | Set Charging Voltage | 2000 V   | Set Divert Valve | Source    |
|             |          | Set Corona           | 0 nA     | Set APCI Heater  | 0 °C      |

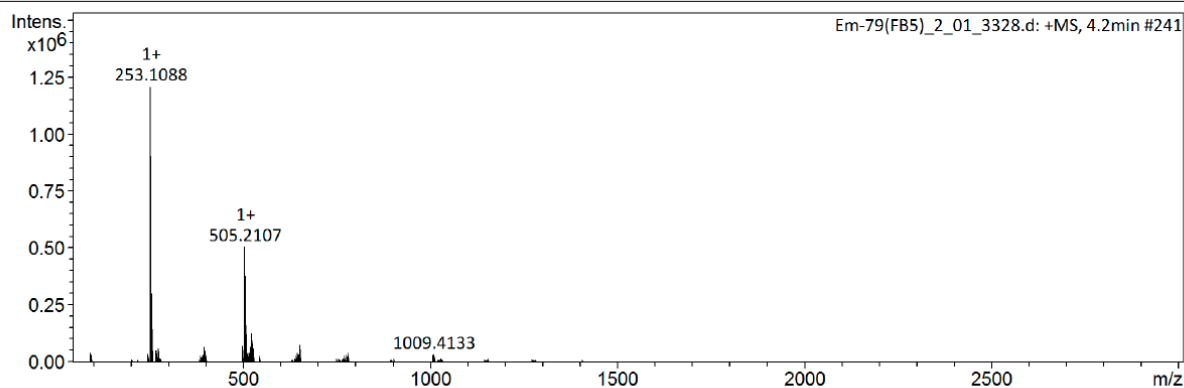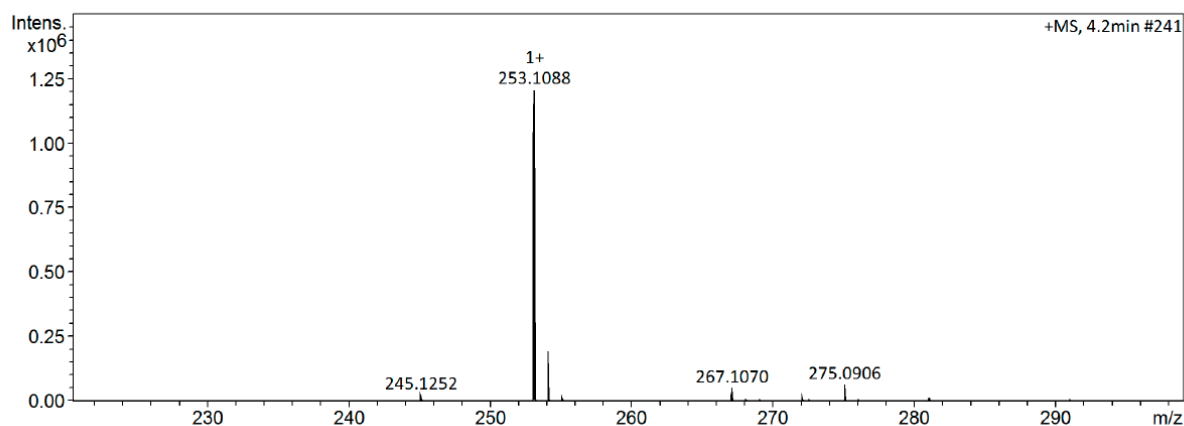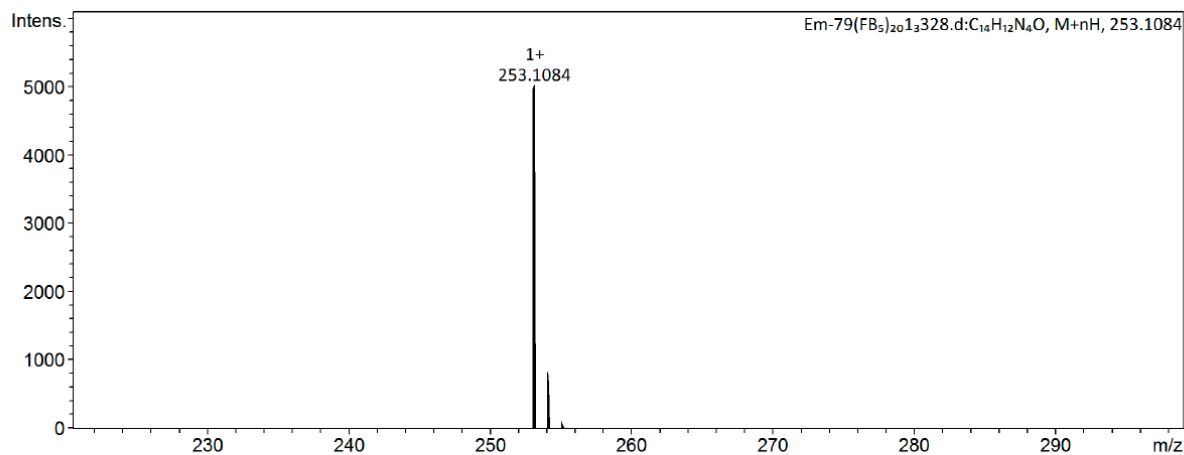

# HRMS spectrum of 6

## Display Report

### Analysis Info

Analysis Name D:\Data\Chizhov\IMB\Matyugina\Aug\_07\_2023\In-199\_&clblow.d  
 Method tune\_low.m  
 Sample Name 6  
 Comment H2O 50/50 %, dil. 200, calibrant added

Acquisition Date 07.08.2023 14:51:03  
 Operator BDAL@DE  
 Instrument / Ser# microTOF CH3CN : 10248

### Acquisition Parameter

|             |            |                      |          |                  |           |
|-------------|------------|----------------------|----------|------------------|-----------|
| Source Type | ESI        | Ion Polarity         | Positive | Set Nebulizer    | 0.4 Bar   |
| Focus       | Not active |                      |          | Set Dry Heater   | 180 °C    |
| Scan Begin  | 50 m/z     | Set Capillary        | 4500 V   | Set Dry Gas      | 4.0 l/min |
| Scan End    | 2000 m/z   | Set End Plate Offset | -500 V   | Set Divert Valve | Waste     |

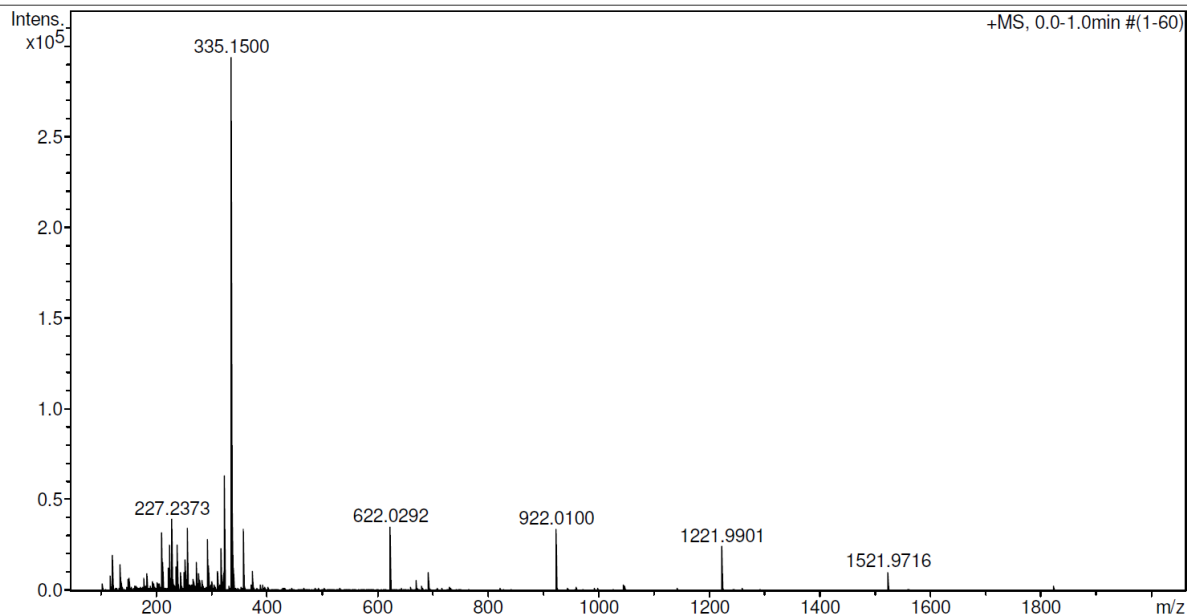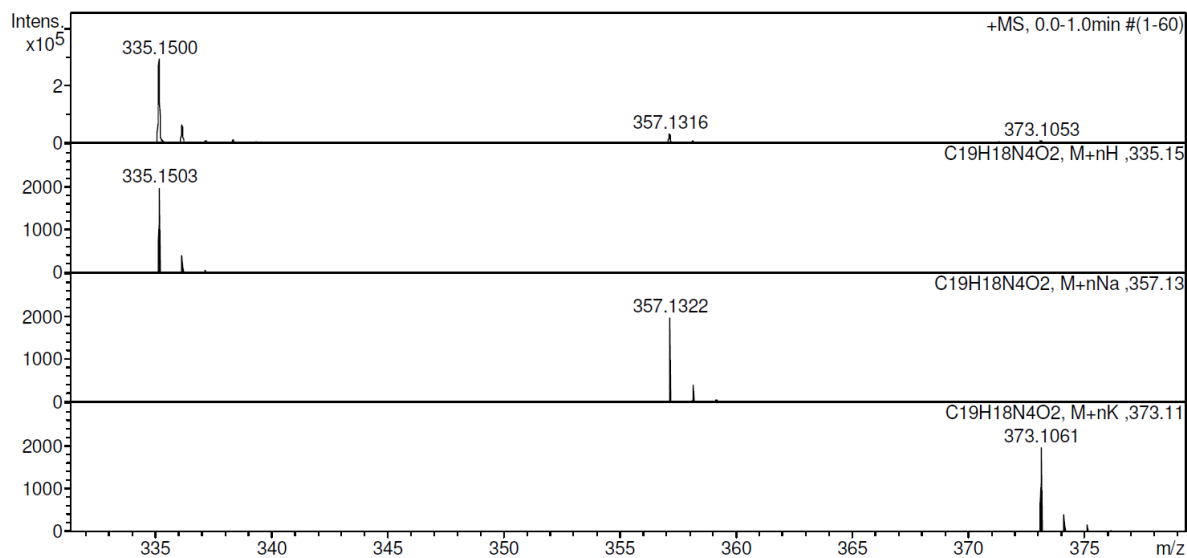

# HRMS spectrum of 7

## Display Report

### Analysis Info

Analysis Name D:\Data\EM112\_1\_01\_3888.d  
Method la\_2.2\_small.m  
Sample Name 7  
Comment

Acquisition Date 9/27/2021 2:52:34 PM

Operator BDAL@DE  
Instrument compact 8255754.20088

### Acquisition Parameter

|             |          |                      |          |                  |           |
|-------------|----------|----------------------|----------|------------------|-----------|
| Source Type | ESI      | Ion Polarity         | Positive | Set Nebulizer    | 0.4 Bar   |
| Focus       | Active   | Set Capillary        | 4500 V   | Set Dry Heater   | 180 °C    |
| Scan Begin  | 50 m/z   | Set End Plate Offset | -500 V   | Set Dry Gas      | 6.0 l/min |
| Scan End    | 3000 m/z | Set Charging Voltage | 2000 V   | Set Divert Valve | Source    |
|             |          | Set Corona           | 0 nA     | Set APCI Heater  | 0 °C      |

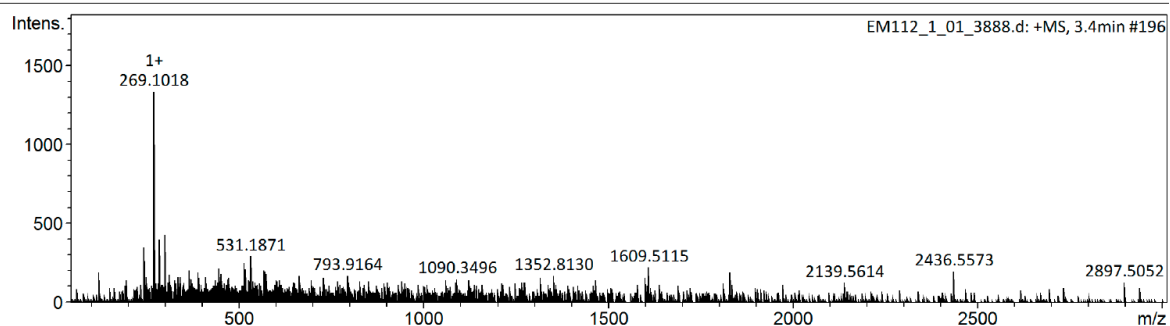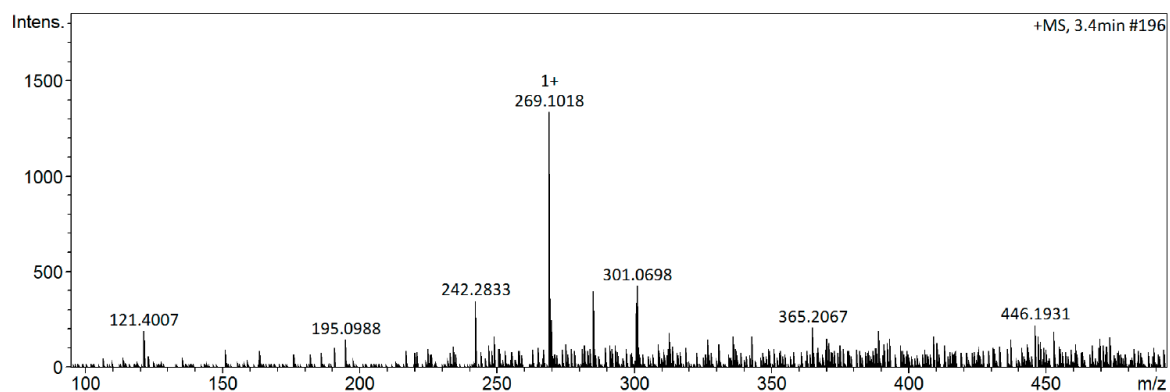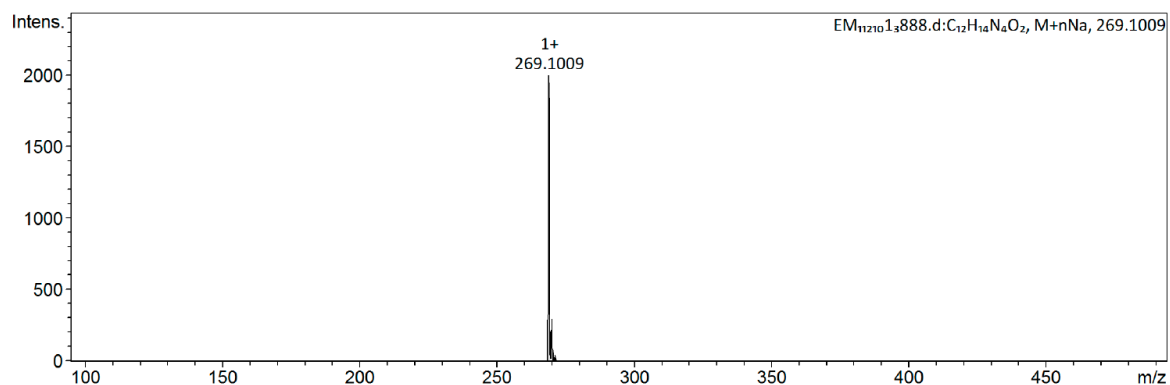

EM112\_1\_01\_3888.d

Bruker Compass DataAnalysis 4.3

printed: 9/27/2021 3:49:59 PM

by: BDAL@DE

Page 1 of 1

# HRMS spectrum of 8

## Display Report

### Analysis Info

Analysis Name D:\Data\Chizhov\IMB\Matyugina\Aug\_07\_2023\In-220\_&clblow.d  
 Method tune\_low.m  
 Sample Name 8  
 Comment H2O 50/50 %, dil. 200, calibrant added

Acquisition Date 07.08.2023 14:46:02

Operator BDAL@DE

Instrument / Ser# micrOTOF CH3CN : 10248

### Acquisition Parameter

|             |            |                      |          |                  |           |
|-------------|------------|----------------------|----------|------------------|-----------|
| Source Type | ESI        | Ion Polarity         | Positive | Set Nebulizer    | 0.4 Bar   |
| Focus       | Not active |                      |          | Set Dry Heater   | 180 °C    |
| Scan Begin  | 50 m/z     | Set Capillary        | 4500 V   | Set Dry Gas      | 4.0 l/min |
| Scan End    | 2000 m/z   | Set End Plate Offset | -500 V   | Set Divert Valve | Waste     |

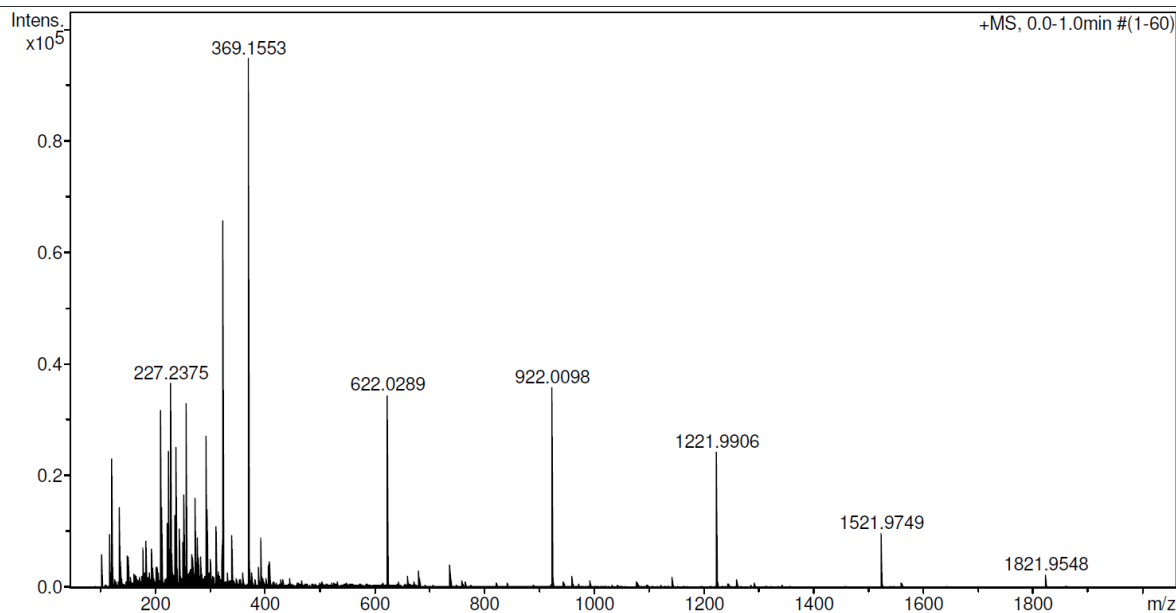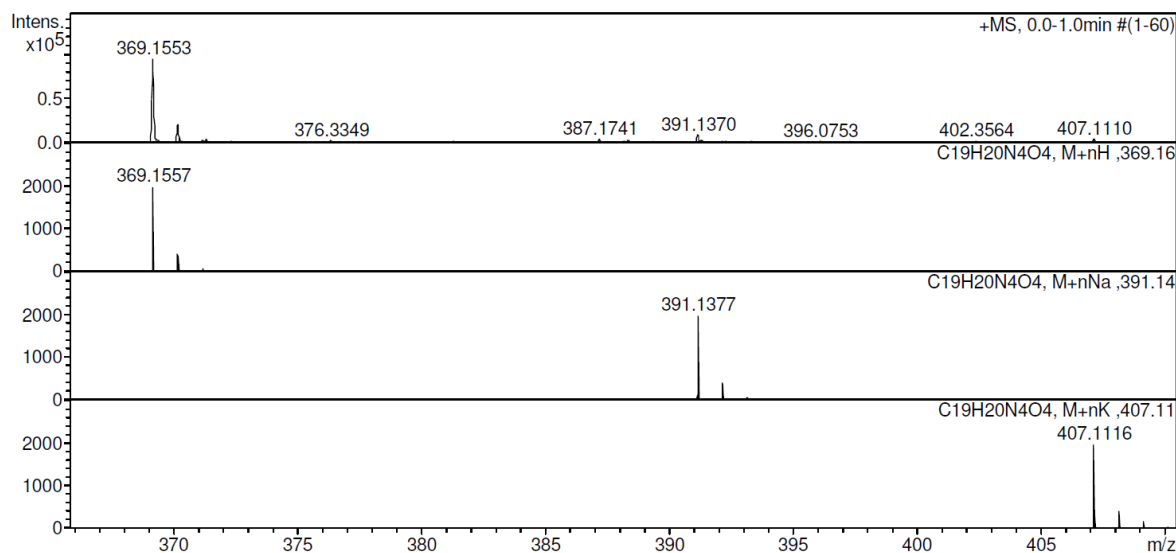



# HRMS spectrum of 9

## Display Report

### Analysis Info

Analysis Name D:\Data\Em123-LN261\_31\_01\_4198.d

Method la\_2.2\_small2.m

Sample Name 9

Comment

Acquisition Date 6/23/2023 3:53:39 PM

Operator BDAL@DE

Instrument compact 8255754.20088

### Acquisition Parameter

|             |          |                      |          |                  |           |
|-------------|----------|----------------------|----------|------------------|-----------|
| Source Type | ESI      | Ion Polarity         | Positive | Set Nebulizer    | 0.4 Bar   |
| Focus       | Active   | Set Capillary        | 3500 V   | Set Dry Heater   | 180 °C    |
| Scan Begin  | 50 m/z   | Set End Plate Offset | -500 V   | Set Dry Gas      | 4.0 l/min |
| Scan End    | 3000 m/z | Set Charging Voltage | 2000 V   | Set Divert Valve | Source    |
|             |          | Set Corona           | 0 nA     | Set APCI Heater  | 0 °C      |

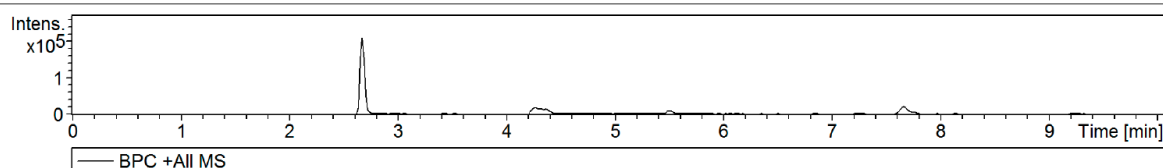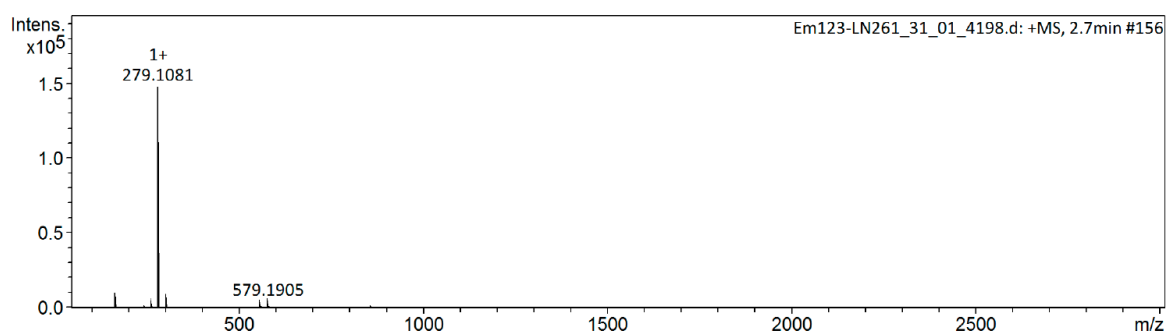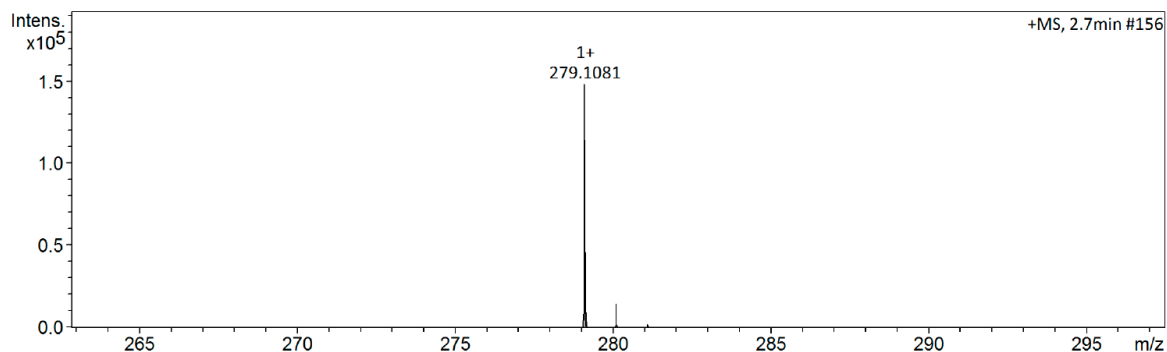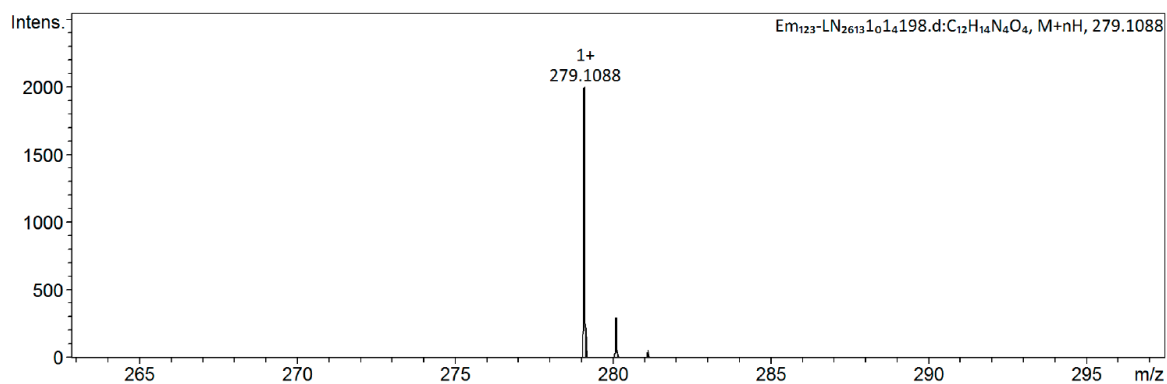

Supplement: s1 [file s1]
